# Supplementary material for: Field induced single ion magnet behavior in CoII complexes in a distorted square pyramidal geometry
Source: Royal Society of Chemistry journal article supplement (doi:10.1039/d3dt01769a), 2023-01-01
Supplement: d3dt01769a1.pdf [file d3dt01769a1.pdf]

*Supplementary Information*

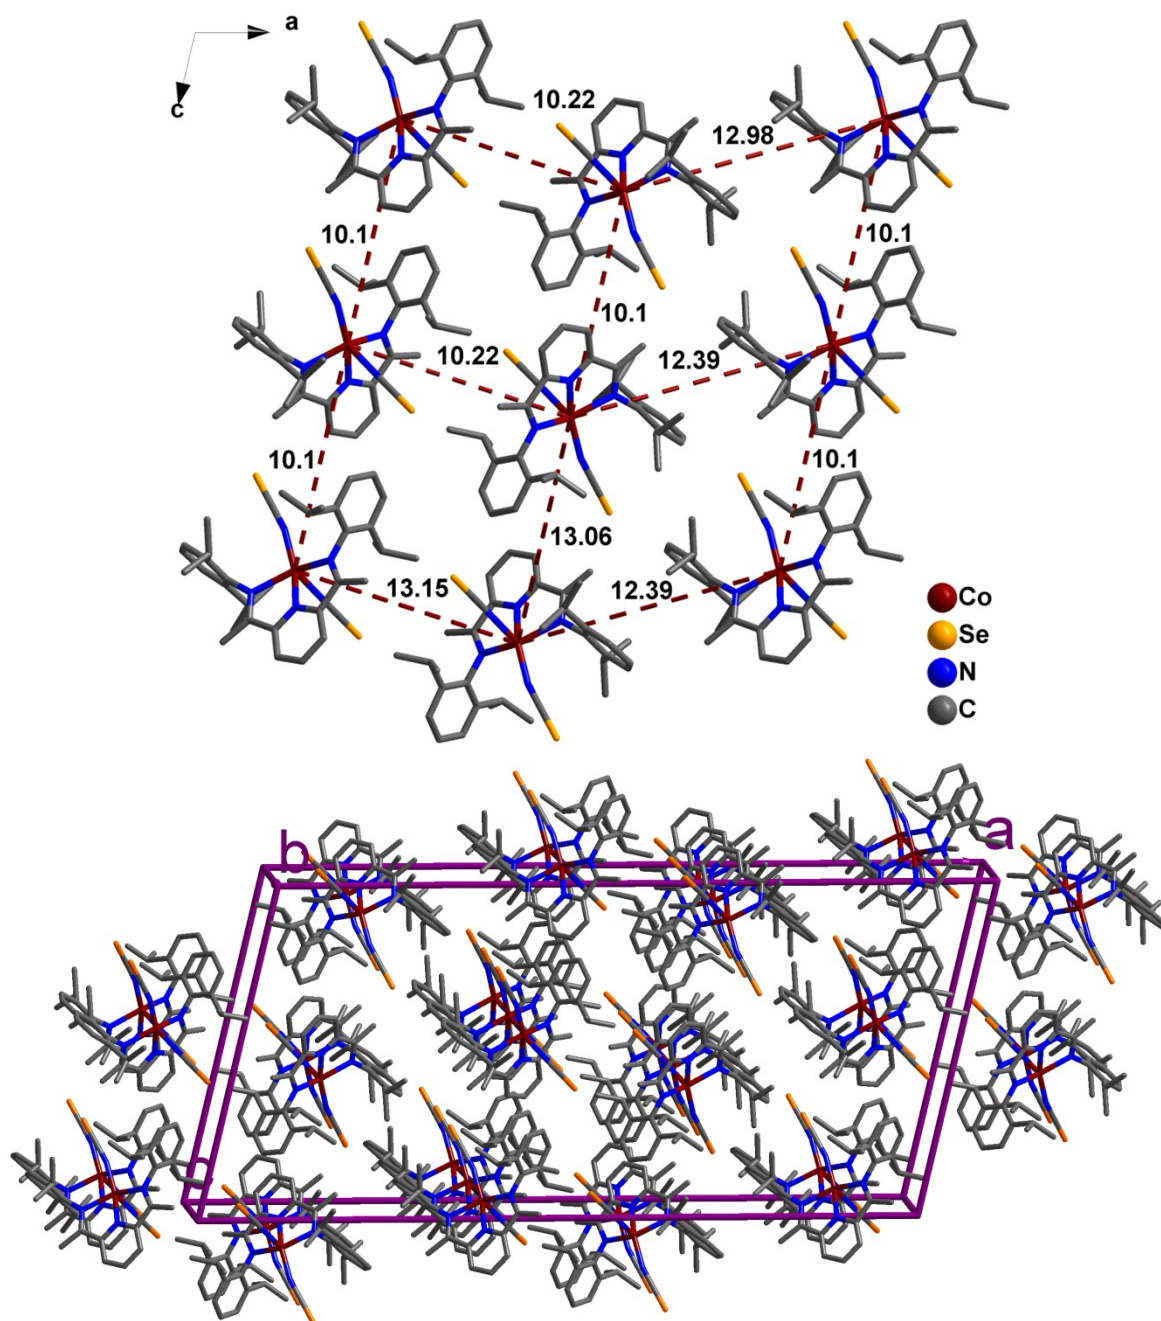

Figure S1(A). Simplified packing diagrams for complex 1 showing the shortest intermolecular  $\text{Co}^{\text{II}} \cdots \text{Co}^{\text{II}}$  distances (in Å) (top) and packing diagram (bottom).

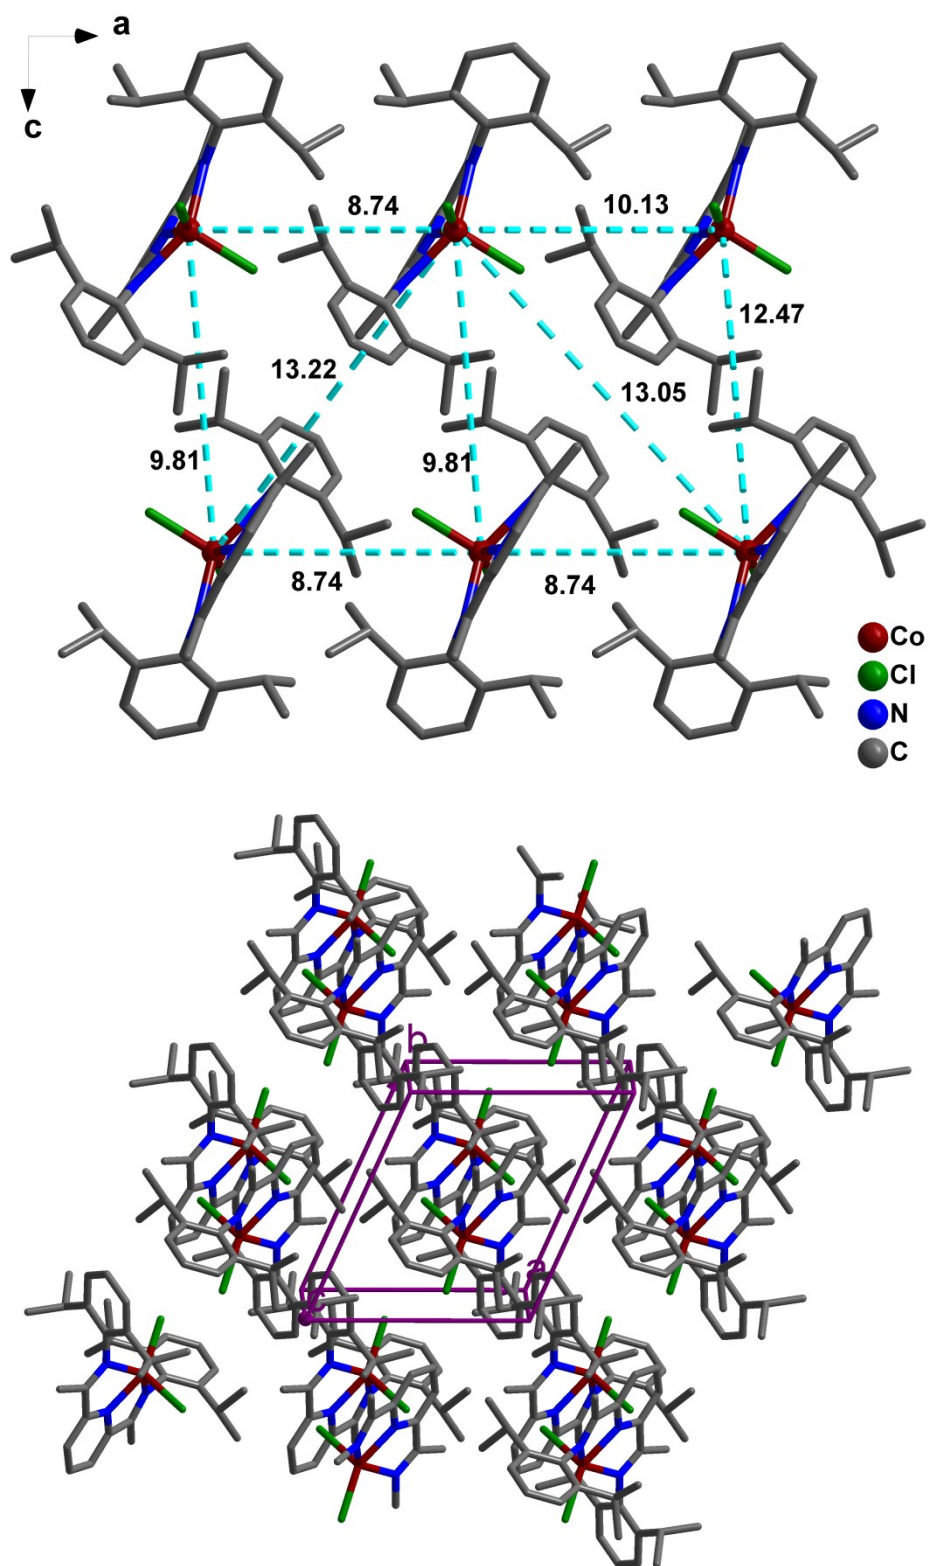

Figure S1(B). Simplified packing diagrams for complex 2 showing the shortest intermolecular  $\text{Co}^{\text{II}} \cdots \text{Co}^{\text{II}}$  distances (in Å) (top) and packing diagram (bottom).

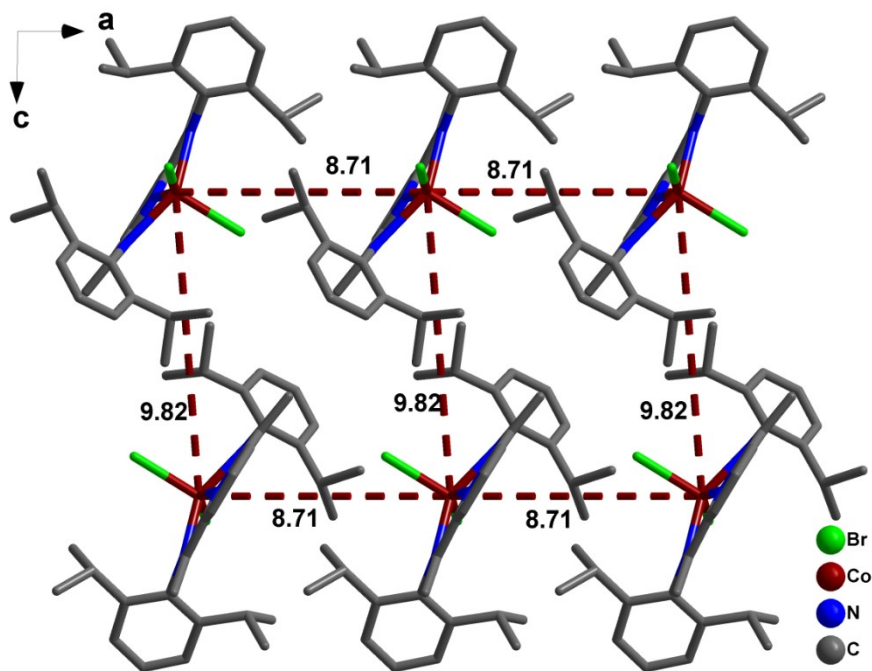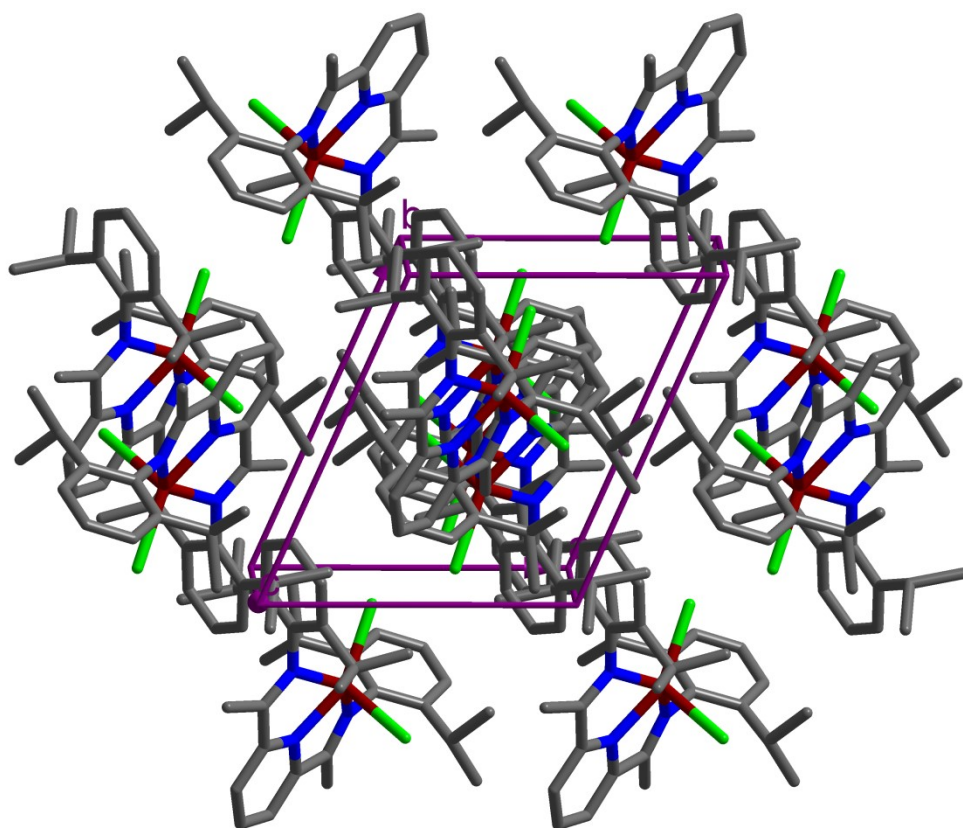

Figure S1(C). Simplified packing diagrams for complex **3** showing the shortest intermolecular  $\text{Co}^{\text{II}}\cdots\text{Co}^{\text{II}}$  distances (in Å) (top) and packing diagram (bottom).

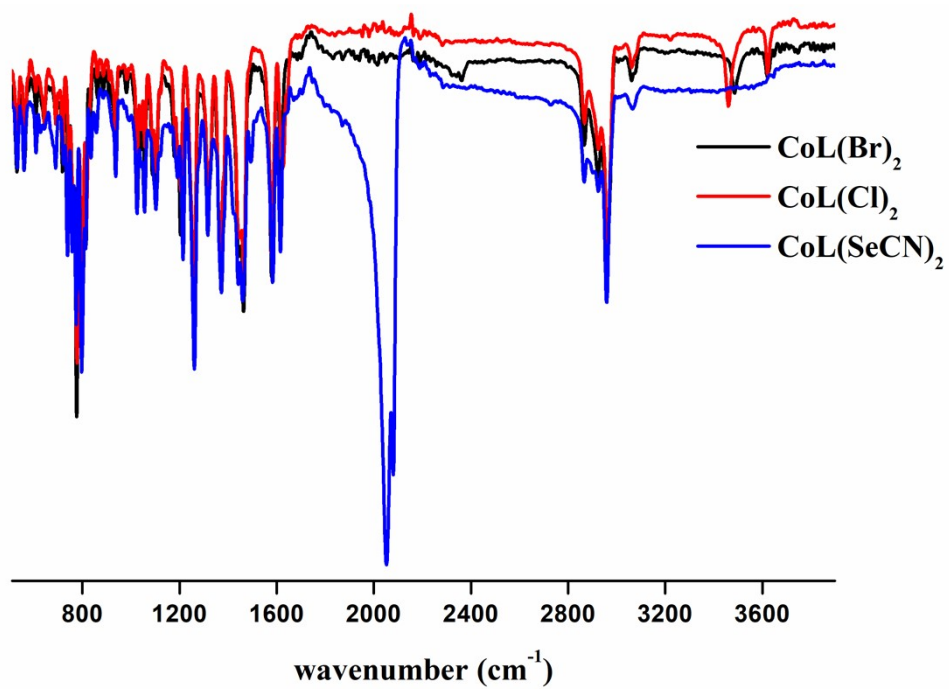

Figure S2. FTIR spectra for complexes 1–3.

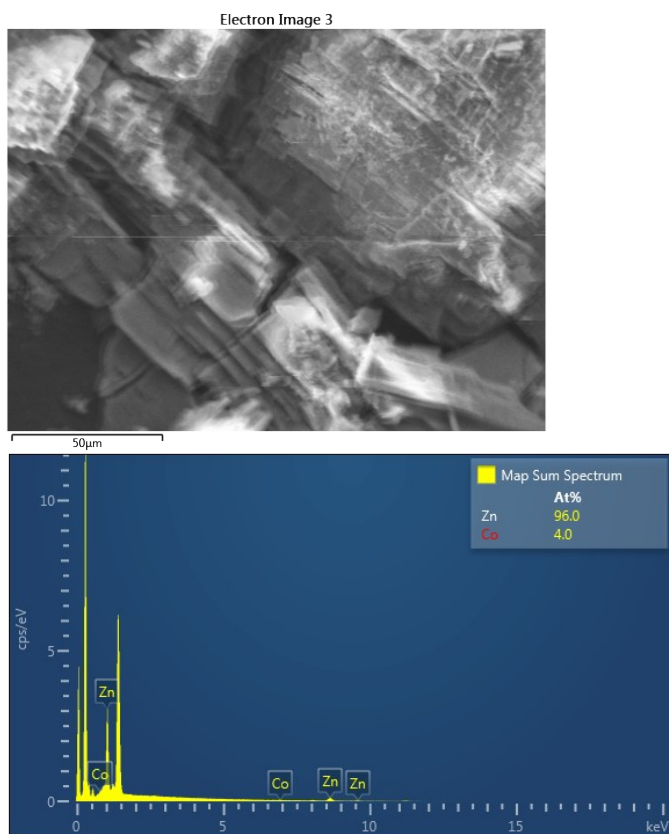

Figure S3. SEM-EDX analysis for diamagnetically diluted  $[\text{Zn}^{\text{II}}_{0.96}\text{Co}^{\text{II}}_{0.04}(\text{L})(\text{NCSe})_2]$ .

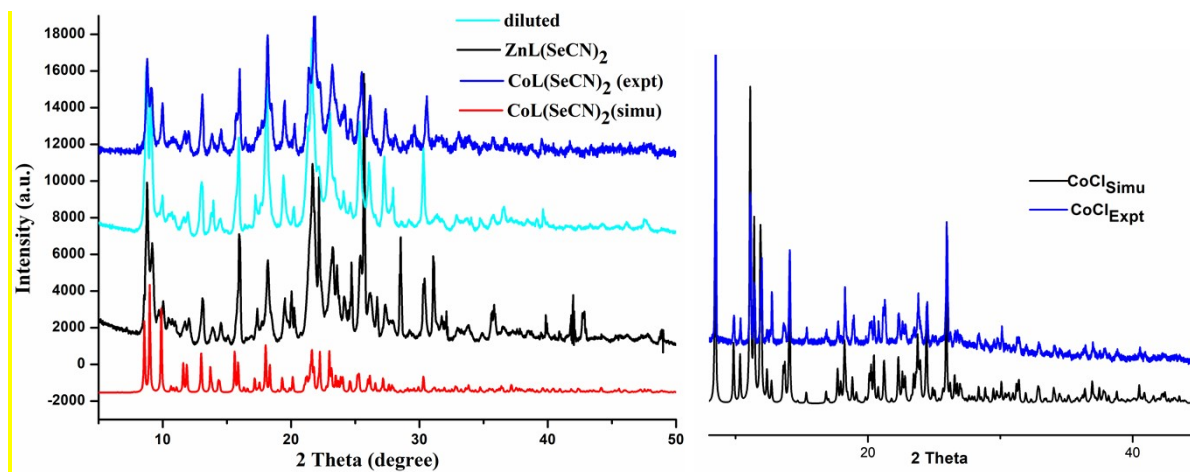

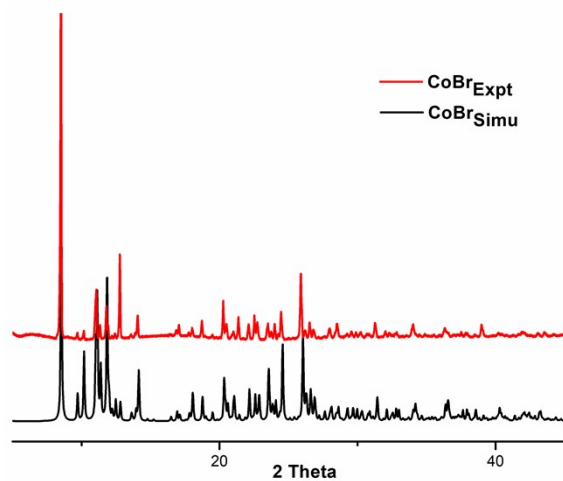

Figure S4. PXRD analysis for the diamgetically diluted  $[\text{Zn}^{\text{II}}_{0.96}\text{Co}^{\text{II}}_{0.04}(\text{L})(\text{NCSe})_2]$  (top left), complex **2** (top right) and complex **3** (bottom).

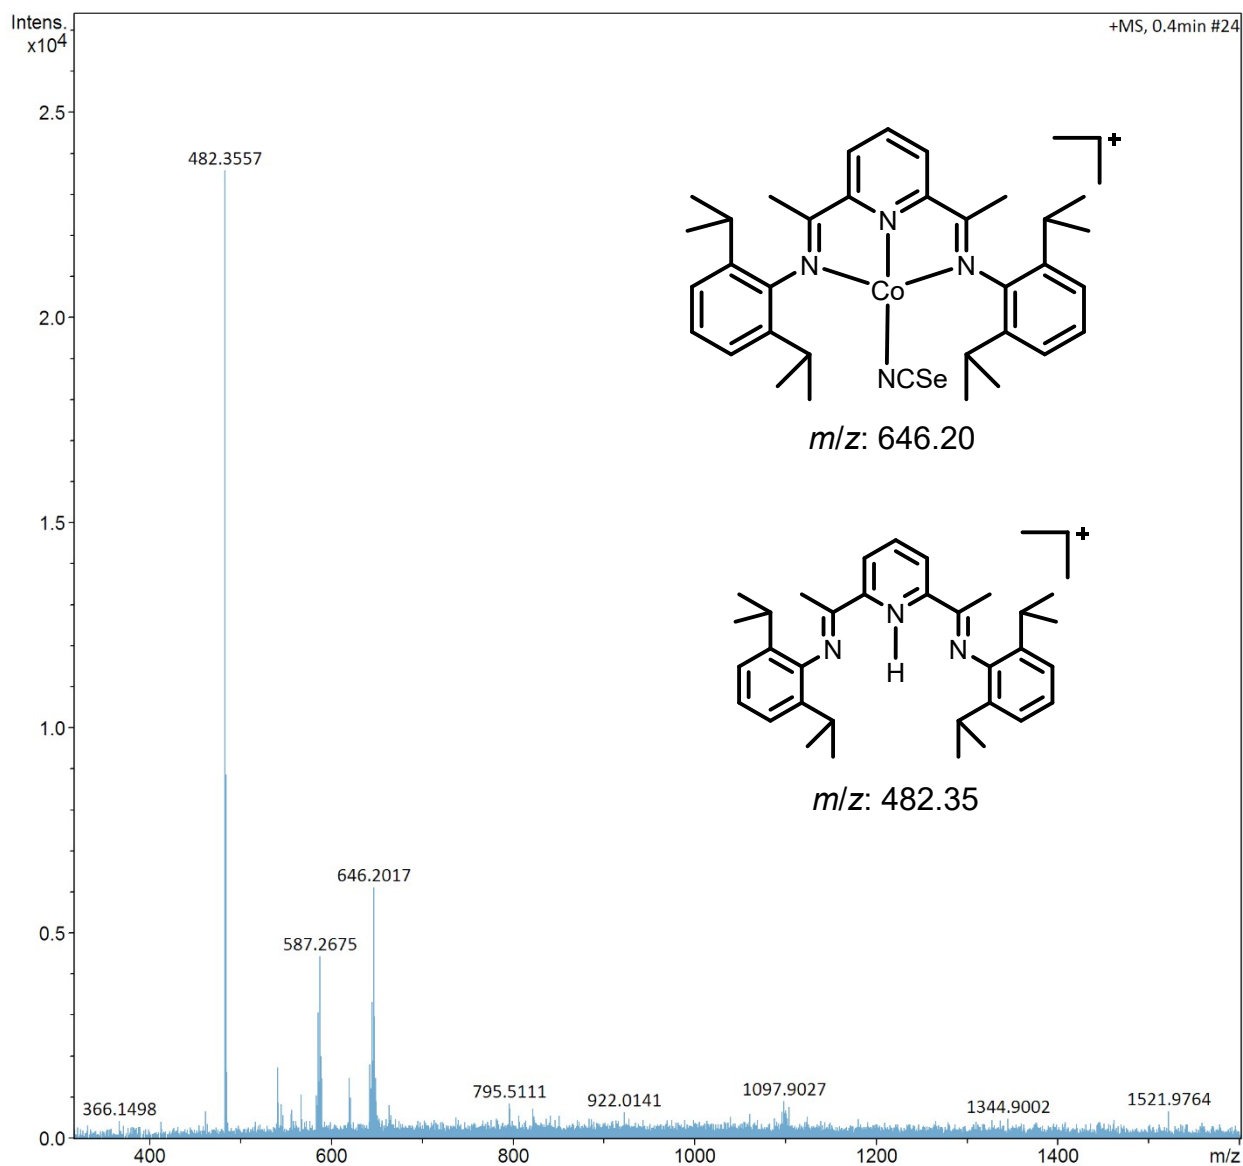

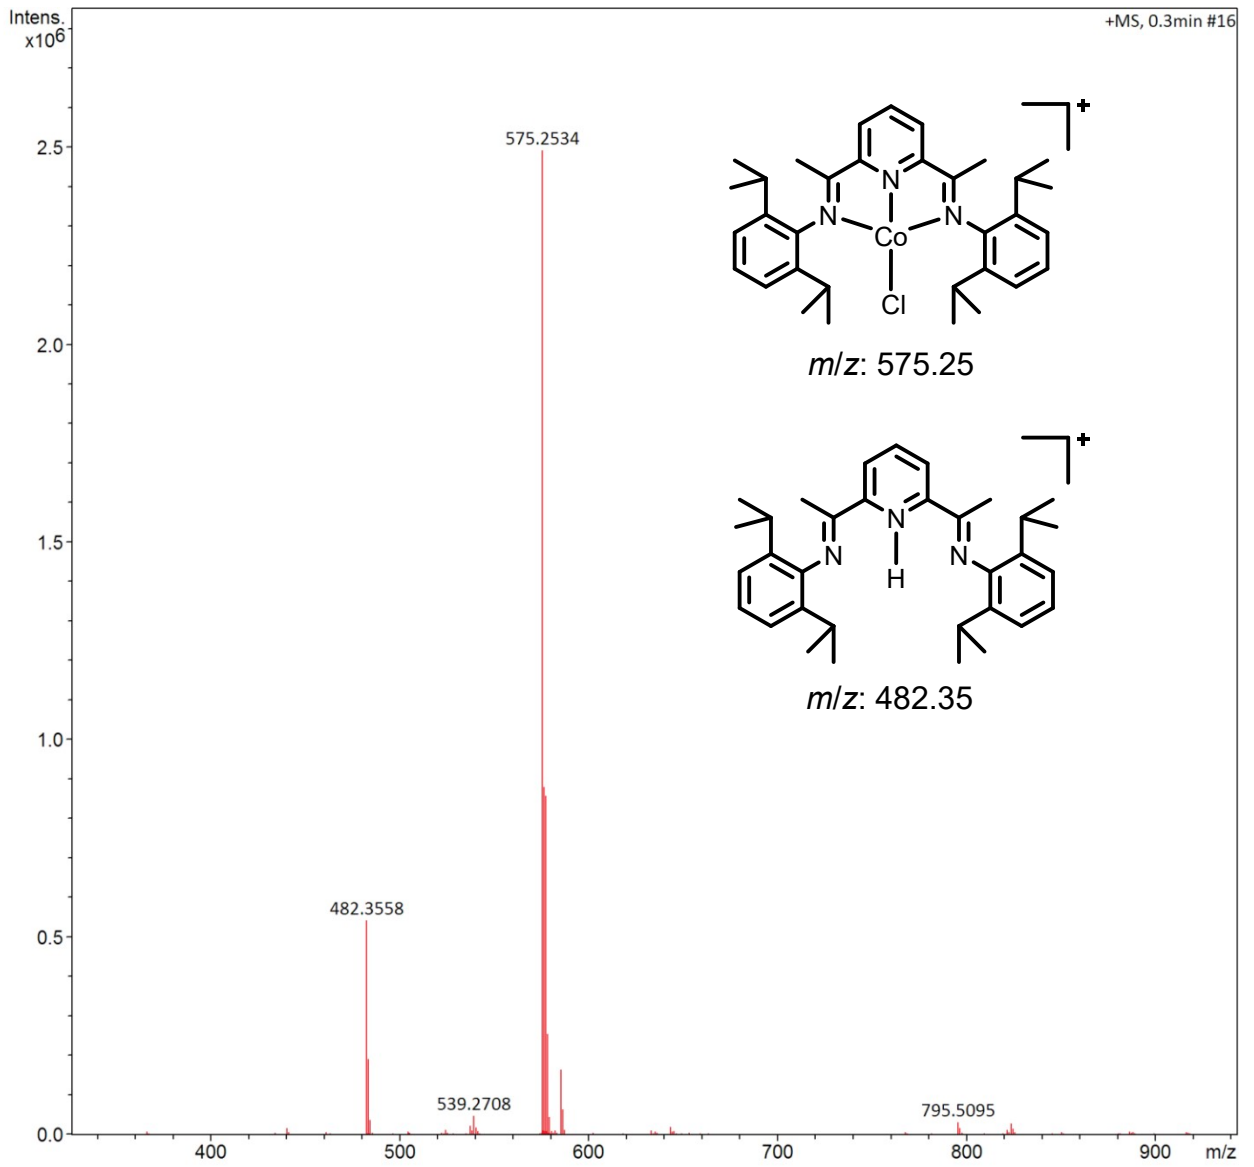

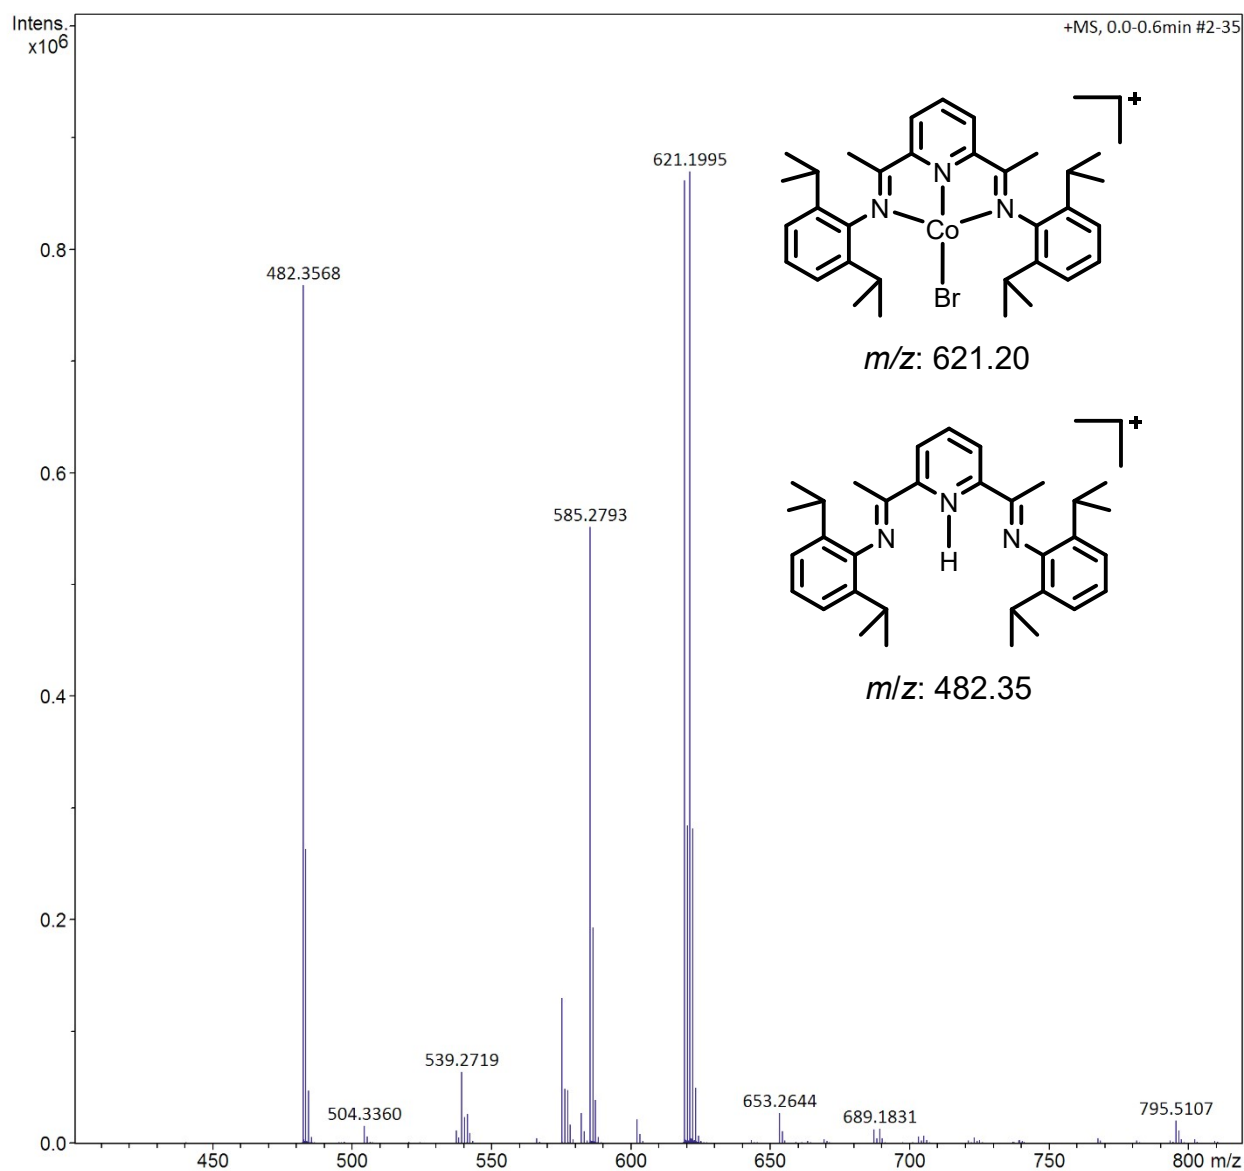

Figure S5. Mass spectra analysis data for complexes 1–3.

Table S1. CShM values for 1–3 and reported 4<sub>Me</sub> and 5<sub>Ph</sub>.

|         |       |                               |
|---------|-------|-------------------------------|
| PP-5    | 1 D5h | Pentagon                      |
| vOC-5   | 2 C4v | Vacant octahedron             |
| TBPY-5  | 3 D3h | Trigonalbipyramid             |
| SPY-5   | 4 C4v | Spherical square pyramid      |
| JTBPY-5 | 5 D3h | Johnson trigonalbipyramid J12 |



| Complexes             | PP-5<br>D5h | vOC-5<br>C4v | TBPY-5<br>D3h | SPY-5<br>C4v | JTBPY-5<br>D3h |
|-----------------------|-------------|--------------|---------------|--------------|----------------|
| SeCN                  | 32.792      | 2.21         | 6.463         | 1.592        | 9.028          |
| Cl                    | 34.157      | 3.821        | 6.847         | 1.811        | 9.973          |
| Br                    | 34.446      | 4.414        | 7.188         | 2.219        | 10.115         |
| <b>4<sub>Me</sub></b> | 32.362      | 2.256        | 6.402         | 1.625        | 9.154          |
| <b>5<sub>Ph</sub></b> | 33.691      | 2.926        | 4.656         | 1.675        | 6.012          |

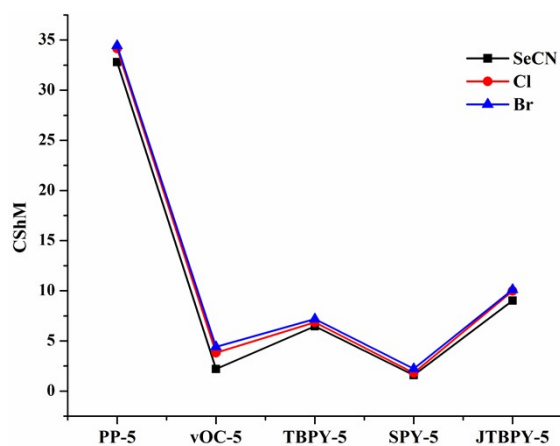

Figure S6. Plot of all the possible geometries for five coordination against the corresponding *CShM* values obtained from the SHAPE measurement for complexes **1–3**.

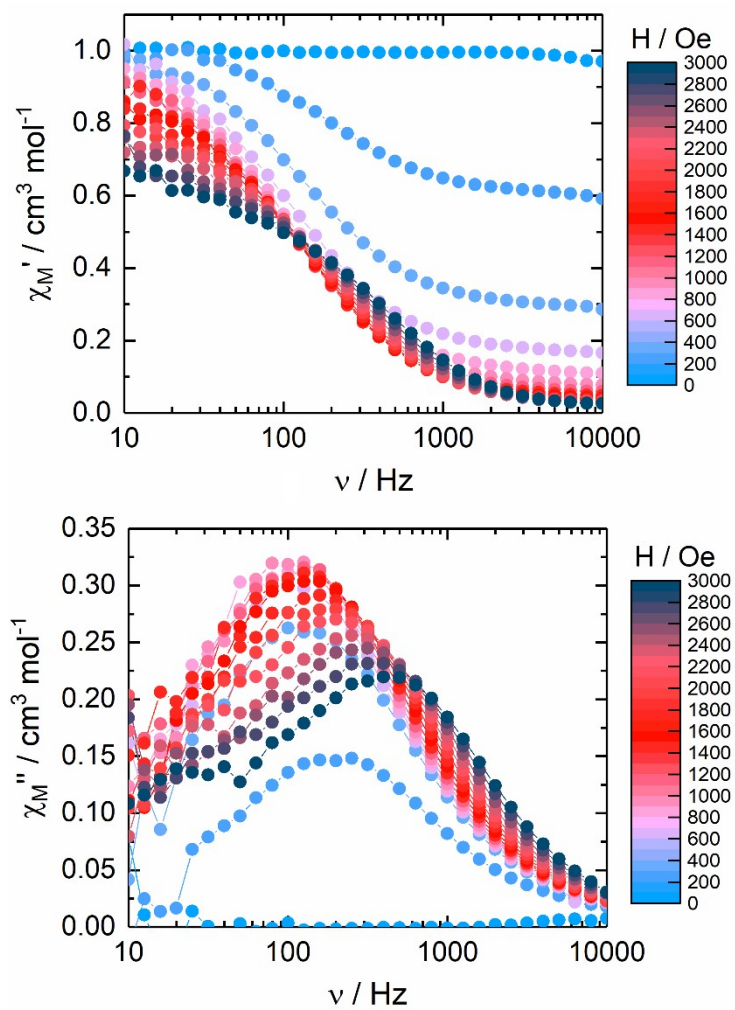

**Figure S7.** In-phase (top) and out-of-phase (bottom) components of the ac magnetic susceptibility for **1** at 2 K under a DC magnetic field from 0 to 3000 Oe.

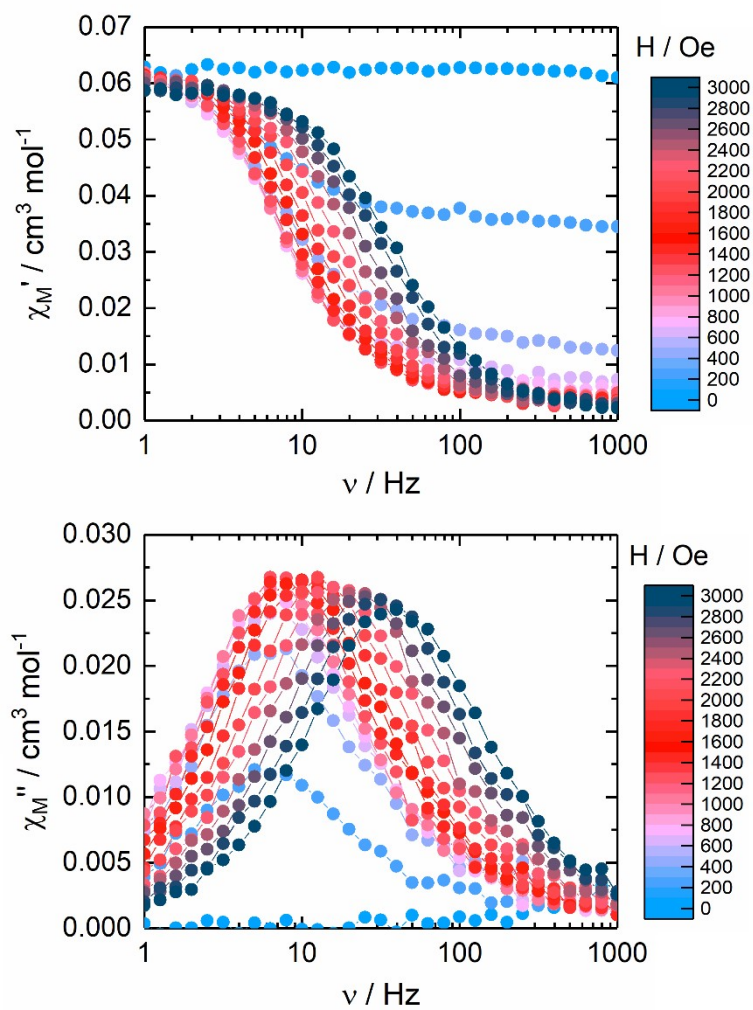

**Figure S8.** In-phase (top) and out-of-phase (bottom) components of the ac magnetic susceptibility for **1@Zn** at 2 K under a DC magnetic field from 0 to 3000 Oe.

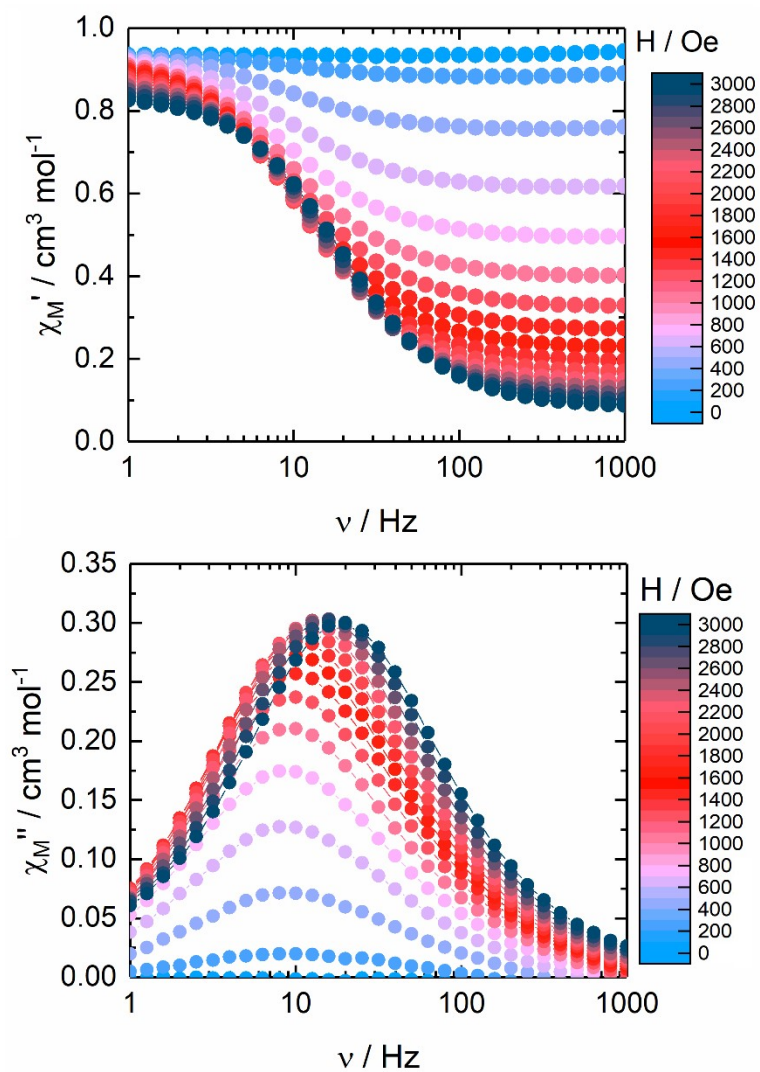

**Figure S9.** In-phase (top) and out-of-phase (bottom) components of the ac magnetic susceptibility for **2** at 2 K under a DC magnetic field from 0 to 3000 Oe.

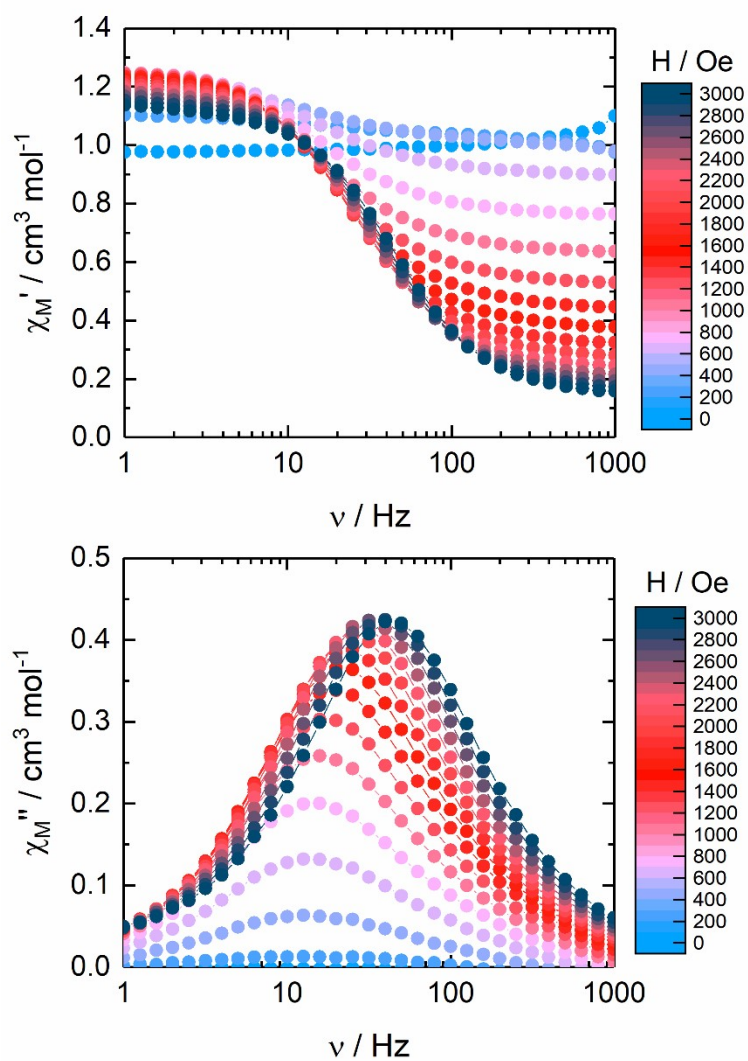

**Figure S10.** In-phase (top) and out-of-phase (bottom) components of the ac magnetic susceptibility for **3** at 2 K under a DC magnetic field from 0 to 3000 Oe.

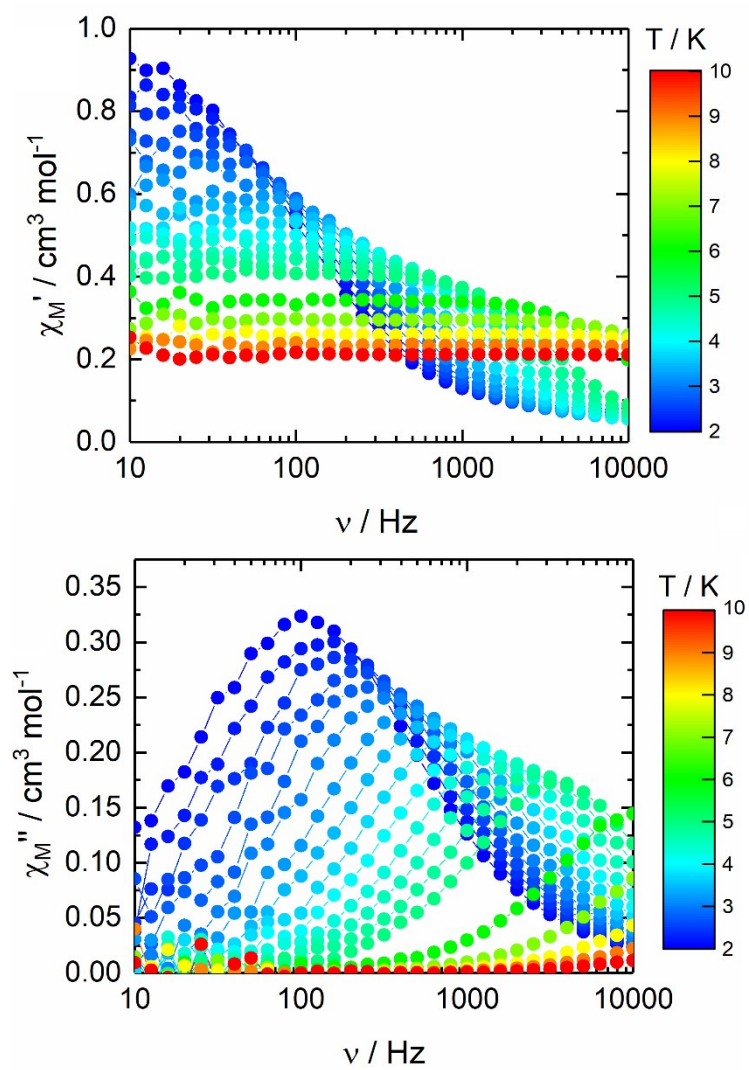

**Figure S11.** Frequency dependence of the in-phase (top) and out-of-phase (bottom) component of the magnetic susceptibility under an applied magnetic field of 1000 Oe between 2 and 10 K for **1**.

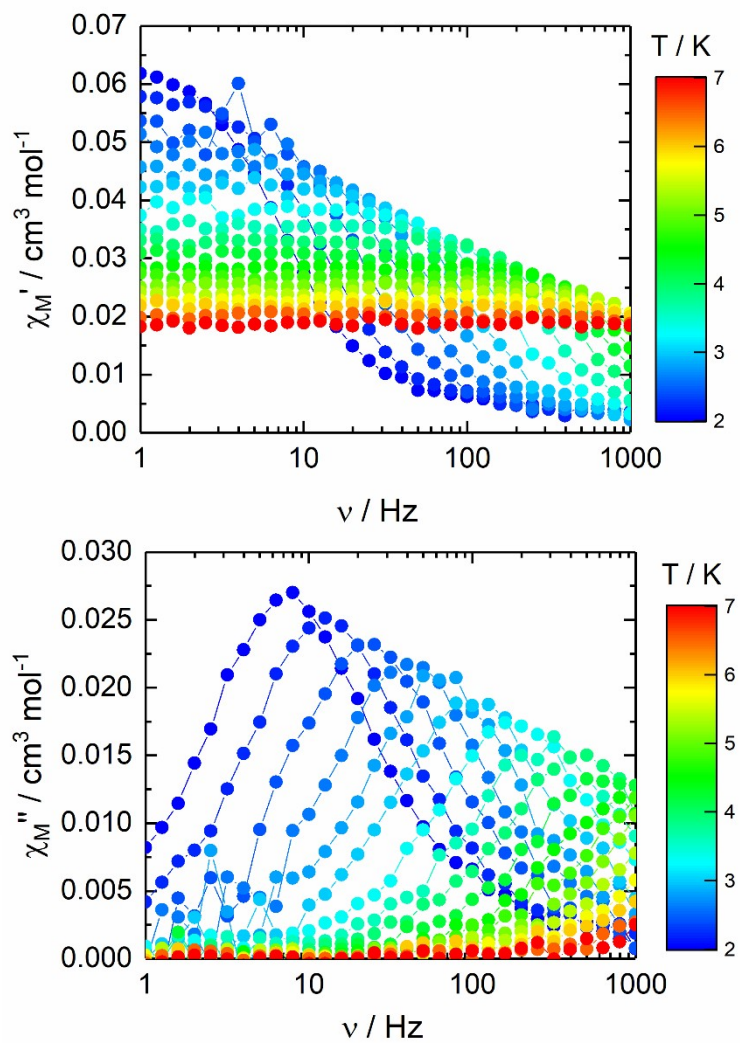

**Figure S12.** Frequency dependence of the in-phase (top) and out-of-phase (bottom) component of the magnetic susceptibility under an applied magnetic field of 1200 Oe between 2 and 7 K for **1@Zn**.

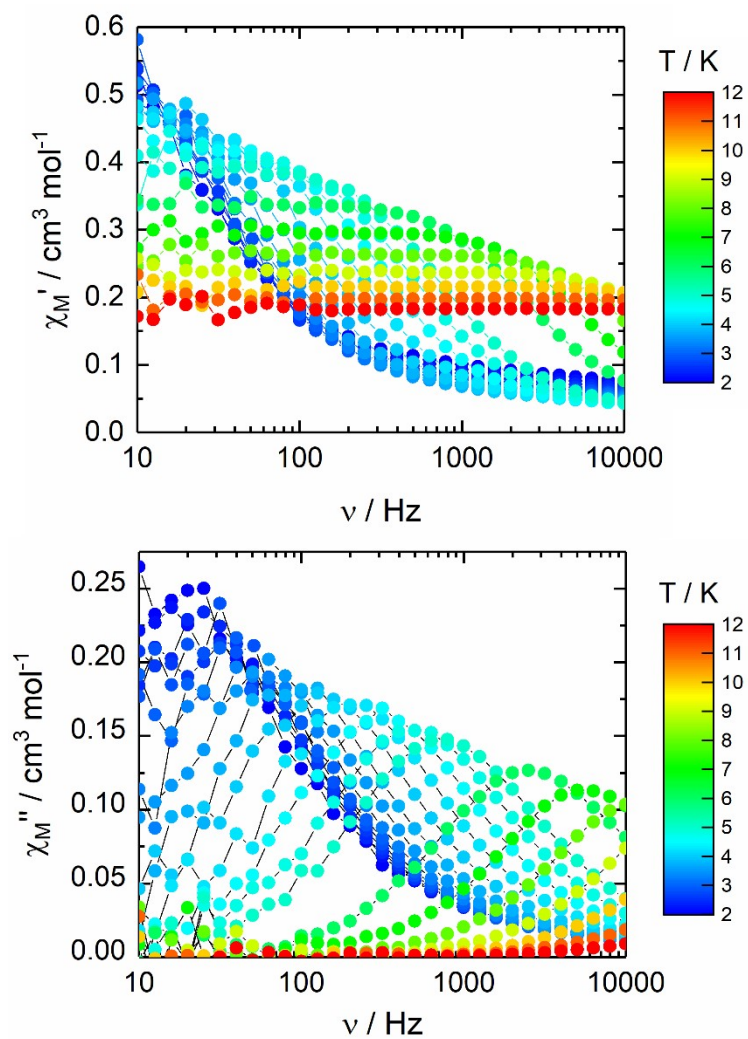

**Figure S13.** Frequency dependence of the in-phase (top) and out-of-phase (bottom) component of the magnetic susceptibility under an applied magnetic field of 3000 Oe between 2 and 12 K for **2**.



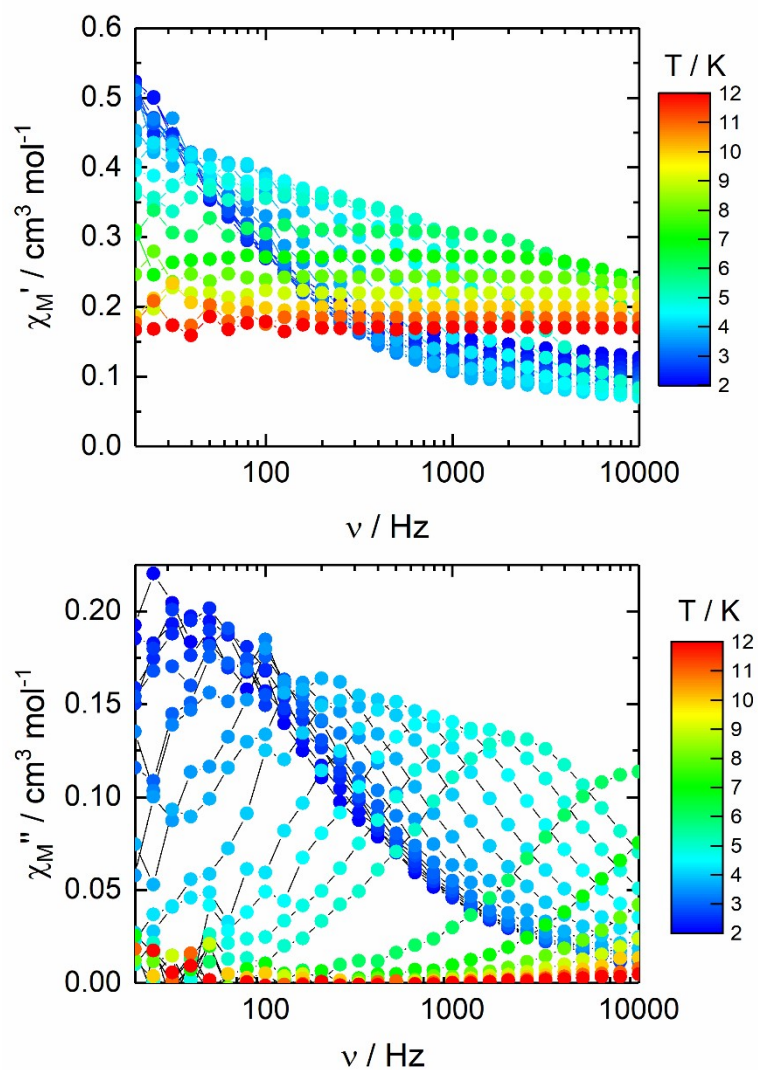

**Figure S14.** Frequency dependence of the in-phase (top) and out-of-phase (bottom) component of the magnetic susceptibility under an applied magnetic field of 3000 Oe between 2 and 12 K for **3**.

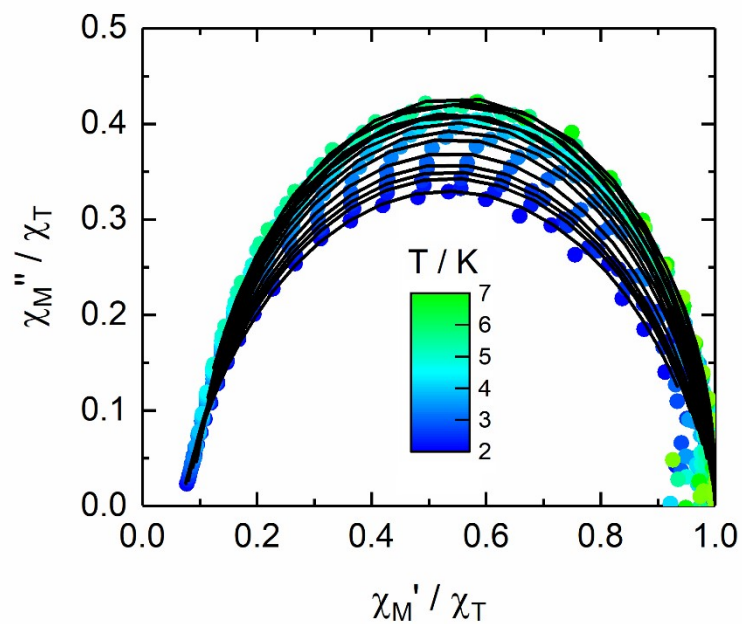

**Figure S15.** Normalized Cole-Cole plot for **1** at several temperatures between 2 and 7 K under an applied magnetic field of 1000 Oe. Black lines are the best fitted curves.

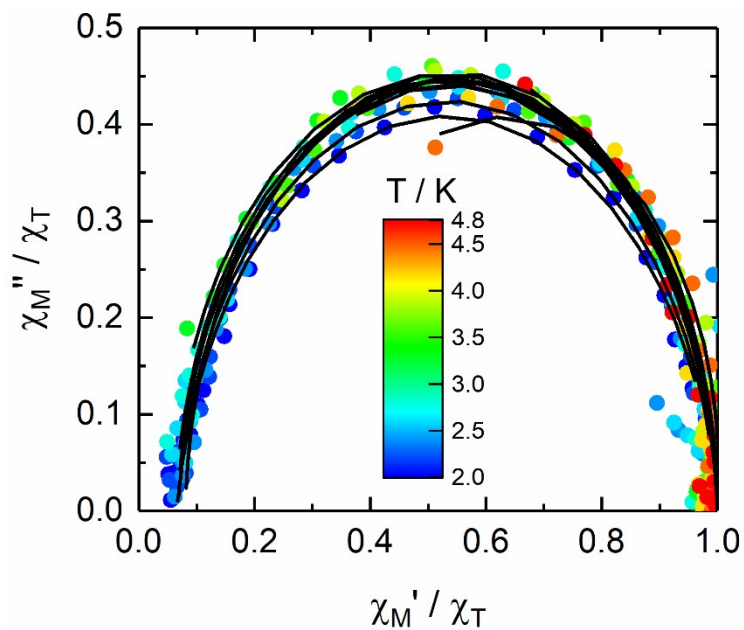

**Figure S16.** Normalized Cole-Cole plot for **1@Zn** at several temperatures between 2 and 4.8 K under an applied magnetic field of 1200 Oe. Black lines are the best fitted curves.

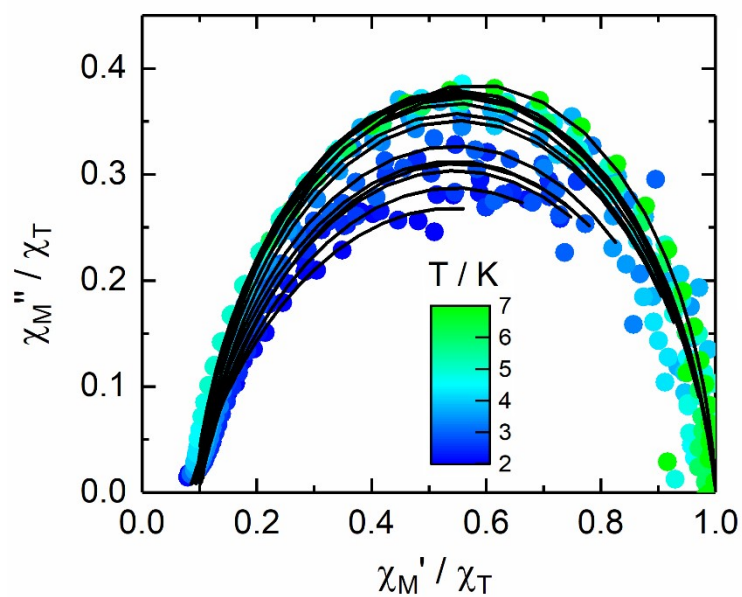

**Figure S17.** Normalized Cole-Cole plot for **2** at several temperatures between 2 and 7 K under an applied magnetic field of 3000 Oe. Black lines are the best fitted curves.

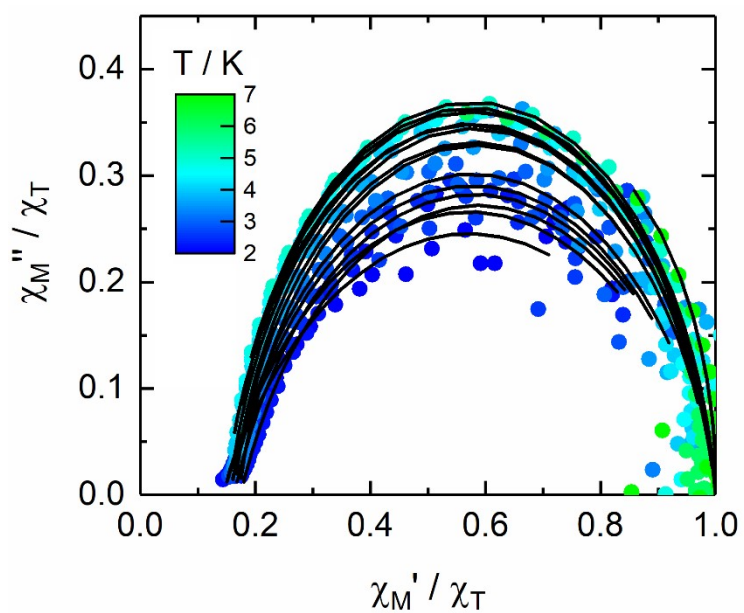

**Figure S18.** Normalized Cole-Cole plot for **3** at several temperatures between 2 and 7 K under an applied magnetic field of 3000 Oe. Black lines are the best fitted curves.

### Extended Debye model.

$$\chi_M' = \chi_S + (\chi_T - \chi_S) \frac{1 + (\omega\tau)^{1-\alpha} \sin\left(\alpha \frac{\pi}{2}\right)}{1 + 2(\omega\tau)^{1-\alpha} \sin\left(\alpha \frac{\pi}{2}\right) + (\omega\tau)^{2-2\alpha}}$$

$$\chi_M'' = (\chi_T - \chi_S) \frac{(\omega\tau)^{1-\alpha} \cos\left(\alpha \frac{\pi}{2}\right)}{1 + 2(\omega\tau)^{1-\alpha} \sin\left(\alpha \frac{\pi}{2}\right) + (\omega\tau)^{2-2\alpha}}$$

With  $\chi_T$  the isothermal susceptibility,  $\chi_S$  the adiabatic susceptibility,  $\tau$  the relaxation time and  $\alpha$  an empiric parameter which describe the distribution of the relaxation time. For SMM with only one relaxing object  $\alpha$  is close to zero. The extended Debye model was applied to fit simultaneously the experimental variations of  $\chi_M'$  and  $\chi_M''$  with the frequency  $\nu$  of the oscillating field ( $\omega = 2\pi\nu$ ). Typically, only the temperatures for which a maximum on the  $\chi''$  vs.  $f$  curves, have been considered. The best fitted parameters  $\tau$ ,  $\alpha$ ,  $\chi_T$ ,  $\chi_S$  are listed in Tables S2-S9 with the coefficient of determination  $R^2$ .

**Table S2.** Best fitted parameters ( $\chi_T$ ,  $\chi_S$ ,  $\tau$  and  $\alpha$ ) with the extended Debye model for compound **1** at 2 K in the magnetic field range 200-3000 Oe.

| H / Oe | $\chi_S / \text{cm}^3 \text{mol}^{-1}$ | $\chi_T / \text{cm}^3 \text{mol}^{-1}$ | $\tau / \text{s}$ | $\alpha$ | $R^2$   |
|--------|----------------------------------------|----------------------------------------|-------------------|----------|---------|
| 200    | 0.60315                                | 0.99838                                | 7.80302E-4        | 0.15072  | 0.99907 |
| 400    | 0.2859                                 | 1.01403                                | 0.00125           | 0.19661  | 0.99905 |
| 600    | 0.15679                                | 1.03737                                | 0.00157           | 0.22194  | 0.99807 |
| 800    | 0.09934                                | 1.00342                                | 0.00159           | 0.21113  | 0.9996  |
| 1000   | 0.06716                                | 0.96896                                | 0.00151           | 0.20807  | 0.99938 |
| 1200   | 0.04112                                | 0.98223                                | 0.00155           | 0.24148  | 0.99873 |
| 1400   | 0.02599                                | 0.97138                                | 0.0015            | 0.2541   | 0.99774 |
| 1600   | 0.02411                                | 0.90127                                | 0.00125           | 0.22082  | 0.99903 |
| 1800   | 0.0119                                 | 0.89282                                | 0.0012            | 0.25136  | 0.99843 |
| 2000   | 0.00707                                | 0.84059                                | 0.00104           | 0.24699  | 0.99772 |
| 2200   | 0.01548                                | 0.75152                                | 7.79338E-4        | 0.18626  | 0.99923 |
| 2400   | 0.01218                                | 0.70418                                | 6.60142E-4        | 0.18504  | 0.99905 |
| 2600   | 0.01071                                | 0.66938                                | 5.66104E-4        | 0.17972  | 0.99895 |
| 2800   | 0.00708                                | 0.64024                                | 4.93266E-4        | 0.18787  | 0.99831 |
| 3000   | 0.00524                                | 0.60518                                | 4.17821E-4        | 0.18824  | 0.99813 |

**Table S3.** Best fitted parameters ( $\chi_T$ ,  $\chi_S$ ,  $\tau$  and  $\alpha$ ) with the extended Debye model for compound **1@Zn** at 2 K in the magnetic field range 200-3000 Oe.

| H / Oe | $\chi_S / \text{cm}^3 \text{mol}^{-1}$ | $\chi_T / \text{cm}^3 \text{mol}^{-1}$ | $\tau / \text{s}$ | $\alpha$ | $R^2$ |
|--------|----------------------------------------|----------------------------------------|-------------------|----------|-------|
|--------|----------------------------------------|----------------------------------------|-------------------|----------|-------|

|      |         |         |         |         |         |
|------|---------|---------|---------|---------|---------|
| 200  | 0.03537 | 0.06382 | 0.02219 | 0.12579 | 0.99896 |
| 400  | 0.01375 | 0.06542 | 0.02269 | 0.14729 | 0.99612 |
| 600  | 0.00805 | 0.0646  | 0.02309 | 0.10615 | 0.99781 |
| 800  | 0.00628 | 0.06426 | 0.02309 | 0.08848 | 0.99876 |
| 1000 | 0.00509 | 0.06423 | 0.02198 | 0.08253 | 0.99866 |
| 1200 | 0.00451 | 0.06395 | 0.02065 | 0.07768 | 0.99842 |
| 1400 | 0.00402 | 0.06346 | 0.01822 | 0.06951 | 0.99876 |
| 1600 | 0.00356 | 0.06297 | 0.01583 | 0.06999 | 0.99888 |
| 1800 | 0.00358 | 0.06256 | 0.01366 | 0.06426 | 0.99897 |
| 2000 | 0.00321 | 0.06222 | 0.01143 | 0.07047 | 0.99931 |
| 2200 | 0.00299 | 0.06167 | 0.00939 | 0.07433 | 0.99905 |
| 2400 | 0.00283 | 0.06095 | 0.00758 | 0.07319 | 0.99936 |
| 2600 | 0.00257 | 0.06061 | 0.00622 | 0.08008 | 0.99933 |
| 2800 | 0.00231 | 0.06    | 0.00498 | 0.09464 | 0.99926 |
| 3000 | 0.00199 | 0.05936 | 0.0041  | 0.098   | 0.99948 |

**Table S4.** Best fitted parameters ( $\chi_T$ ,  $\chi_S$ ,  $\tau$  and  $\alpha$ ) with the extended Debye model for compound **2** at 2 K in the magnetic field range 200-3000 Oe.

| H / Oe | $\chi_S / \text{cm}^3 \text{mol}^{-1}$ | $\chi_T / \text{cm}^3 \text{mol}^{-1}$ | $\tau / \text{s}$ | $\alpha$ | R <sup>2</sup> |
|--------|----------------------------------------|----------------------------------------|-------------------|----------|----------------|
| 200    | 0.88567                                | 0.93101                                | 0.01713           | 0.00944  | 0.99982        |
| 400    | 0.75752                                | 0.93318                                | 0.01685           | 0.10686  | 0.99983        |
| 600    | 0.61577                                | 0.93612                                | 0.01723           | 0.13133  | 0.99985        |
| 800    | 0.49467                                | 0.93768                                | 0.01714           | 0.14208  | 0.99987        |
| 1000   | 0.39976                                | 0.93676                                | 0.01658           | 0.14705  | 0.99987        |
| 1200   | 0.3268                                 | 0.93453                                | 0.01582           | 0.15104  | 0.99985        |
| 1400   | 0.27094                                | 0.93066                                | 0.01527           | 0.15287  | 0.99985        |
| 1600   | 0.22758                                | 0.92486                                | 0.01476           | 0.15211  | 0.99984        |
| 1800   | 0.19347                                | 0.91725                                | 0.01406           | 0.14916  | 0.99985        |
| 2000   | 0.1666                                 | 0.90804                                | 0.01319           | 0.14558  | 0.99987        |
| 2200   | 0.14421                                | 0.8968                                 | 0.01219           | 0.14255  | 0.99999        |
| 2400   | 0.12596                                | 0.88511                                | 0.01118           | 0.14094  | 0.99993        |
| 2600   | 0.10971                                | 0.87282                                | 0.01017           | 0.14251  | 0.99997        |
| 2800   | 0.09565                                | 0.86053                                | 0.00924           | 0.14601  | 0.99998        |
| 3000   | 0.08159                                | 0.84734                                | 0.00836           | 0.15193  | 0.99999        |

**Table S5.** Best fitted parameters ( $\chi_T$ ,  $\chi_S$ ,  $\tau$  and  $\alpha$ ) with the extended Debye model for compound **3** at 2 K in the magnetic field range 400-3000 Oe.

| H / Oe | $\chi_S / \text{cm}^3 \text{mol}^{-1}$ | $\chi_T / \text{cm}^3 \text{mol}^{-1}$ | $\tau / \text{s}$ | $\alpha$ | R <sup>2</sup> |
|--------|----------------------------------------|----------------------------------------|-------------------|----------|----------------|
| 400    | 1.03987                                | 1.18929                                | 0.01132           | 0.05768  | 0.99996        |
| 600    | 0.91156                                | 1.24629                                | 0.01058           | 0.12522  | 0.99995        |
| 800    | 0.76875                                | 1.26113                                | 0.00998           | 0.12079  | 0.99988        |

|      |         |         |         |         |         |
|------|---------|---------|---------|---------|---------|
| 1000 | 0.63991 | 1.26361 | 0.00928 | 0.11551 | 0.99987 |
| 1200 | 0.53366 | 1.25988 | 0.00846 | 0.1109  | 0.99985 |
| 1400 | 0.44858 | 1.25356 | 0.0077  | 0.10873 | 0.99983 |
| 1600 | 0.38028 | 1.24416 | 0.00706 | 0.1047  | 0.99983 |
| 1800 | 0.32494 | 1.23309 | 0.00652 | 0.10112 | 0.99986 |
| 2000 | 0.28026 | 1.22045 | 0.00598 | 0.09789 | 0.99989 |
| 2200 | 0.24262 | 1.20661 | 0.00546 | 0.09677 | 0.99993 |
| 2400 | 0.21201 | 1.19058 | 0.00494 | 0.09703 | 0.99992 |
| 2600 | 0.18517 | 1.17365 | 0.00446 | 0.09912 | 0.99992 |
| 2800 | 0.16292 | 1.15588 | 0.00402 | 0.10261 | 0.99991 |
| 3000 | 0.1428  | 1.13774 | 0.00362 | 0.10785 | 0.99985 |

**Table S6.** Best fitted parameters ( $\chi_T$ ,  $\chi_S$ ,  $\tau$  and  $\alpha$ ) with the extended Debye model for compound **1** at 1000Oe in the temperature range 2-7 K.

| T / K | $\chi_S / \text{cm}^3 \text{mol}^{-1}$ | $\chi_T / \text{cm}^3 \text{mol}^{-1}$ | $\alpha$ | $\tau / \text{s}$ | $R^2$   |
|-------|----------------------------------------|----------------------------------------|----------|-------------------|---------|
| 2     | 0.06531                                | 0.98463                                | 0.21693  | 0.00156           | 0.99964 |
| 2.2   | 0.06333                                | 0.89508                                | 0.19011  | 0.00117           | 0.99874 |
| 2.4   | 0.05952                                | 0.83391                                | 0.17769  | 9.26194E-4        | 0.99919 |
| 2.6   | 0.05571                                | 0.77257                                | 0.16417  | 7.23254E-4        | 0.99844 |
| 2.8   | 0.05542                                | 0.72113                                | 0.14074  | 5.67534E-4        | 0.99861 |
| 3     | 0.05532                                | 0.66275                                | 0.1118   | 4.38207E-4        | 0.9964  |
| 3.25  | 0.05185                                | 0.6129                                 | 0.09752  | 3.25158E-4        | 0.99816 |
| 3.5   | 0.04959                                | 0.57011                                | 0.08175  | 2.45005E-4        | 0.99875 |
| 3.75  | 0.04764                                | 0.53458                                | 0.06953  | 1.85872E-4        | 0.99646 |
| 4     | 0.04405                                | 0.50667                                | 0.06881  | 1.41617E-4        | 0.99818 |
| 4.25  | 0.0402                                 | 0.4802                                 | 0.06919  | 1.07127E-4        | 0.99822 |
| 4.5   | 0.04007                                | 0.45086                                | 0.05169  | 8.0247E-5         | 0.99844 |
| 4.75  | 0.03891                                | 0.43046                                | 0.0484   | 6.07272E-5        | 0.99862 |
| 5     | 0.04011                                | 0.40752                                | 0.03439  | 4.56384E-5        | 0.99861 |
| 6     | 0.04991                                | 0.34194                                | 0.00774  | 1.60672E-5        | 0.99536 |
| 7     | 0.0782                                 | 0.29483                                | -0.02603 | 7.89165E-6        | 0.9984  |

**Table S7.** Best fitted parameters ( $\chi_T$ ,  $\chi_S$ ,  $\tau$  and  $\alpha$ ) with the extended Debye model for compound **1@Zn** at 1200Oe in the temperature range 2-4.8 K.

| T / K | $\chi_S / \text{cm}^3 \text{mol}^{-1}$ | $\chi_T / \text{cm}^3 \text{mol}^{-1}$ | $\alpha$ | $\tau / \text{s}$ | $R^2$   |
|-------|----------------------------------------|----------------------------------------|----------|-------------------|---------|
| 2     | 0.00426                                | 0.0646                                 | 0.08477  | 0.02081           | 0.99858 |
| 2.2   | 0.00396                                | 0.05883                                | 0.06054  | 0.01198           | 0.99911 |
| 2.4   | 0.00432                                | 0.05339                                | 0.01511  | 0.00653           | 0.99029 |
| 2.6   | 0.00332                                | 0.04945                                | 0.03474  | 0.00388           | 0.99554 |
| 2.8   | 0.00294                                | 0.04585                                | 0.02876  | 0.00242           | 0.99369 |
| 3     | 0.00252                                | 0.04258                                | 0.0302   | 0.00154           | 0.99789 |
| 3.3   | 0.00216                                | 0.03872                                | 0.02764  | 8.81286E-4        | 0.99806 |
| 3.6   | 0.00281                                | 0.03552                                | 0.02047  | 5.47143E-4        | 0.9981  |

|     |            |         |          |            |         |
|-----|------------|---------|----------|------------|---------|
| 3.9 | 0.00293    | 0.03294 | 0.00321  | 3.59243E-4 | 0.99911 |
| 4.2 | 0.00259    | 0.03062 | 0.02404  | 2.37673E-4 | 0.99875 |
| 4.5 | 0.00755    | 0.02845 | -0.06613 | 2.06985E-4 | 0.9994  |
| 4.8 | 1.09967E-4 | 0.0269  | 0.0392   | 1.05757E-4 | 0.99919 |

**Table S8.** Best fitted parameters ( $\chi_T$ ,  $\chi_S$ ,  $\tau$  and  $\alpha$ ) with the extended Debye model for compound **2** at 3000Oe in the temperature range 2-8 K.

| T / K | $\chi_S / \text{cm}^3 \text{mol}^{-1}$ | $\chi_T / \text{cm}^3 \text{mol}^{-1}$ | $\alpha$ | $\tau / \text{s}$ | R <sup>2</sup> |
|-------|----------------------------------------|----------------------------------------|----------|-------------------|----------------|
| 2     | 0.07653                                | 0.94494                                | 0.32767  | 0.01452           | 0.99632        |
| 2.2   | 0.07213                                | 0.80246                                | 0.28299  | 0.00938           | 0.99755        |
| 2.4   | 0.07005                                | 0.71369                                | 0.23267  | 0.00674           | 0.99767        |
| 2.6   | 0.06271                                | 0.70717                                | 0.25144  | 0.0065            | 0.99685        |
| 2.8   | 0.05829                                | 0.67489                                | 0.23598  | 0.00564           | 0.99376        |
| 3     | 0.05812                                | 0.64879                                | 0.2074   | 0.0047            | 0.99113        |
| 3.25  | 0.05547                                | 0.55237                                | 0.15625  | 0.00311           | 0.99601        |
| 3.5   | 0.05138                                | 0.54034                                | 0.14921  | 0.00251           | 0.99823        |
| 3.75  | 0.05075                                | 0.49233                                | 0.10741  | 0.00166           | 0.99642        |
| 4     | 0.04501                                | 0.49311                                | 0.135    | 0.00121           | 0.99783        |
| 4.25  | 0.04232                                | 0.45984                                | 0.12138  | 7.46267E-4        | 0.99571        |
| 4.5   | 0.03955                                | 0.43791                                | 0.12183  | 4.7947E-4         | 0.99822        |
| 4.75  | 0.03802                                | 0.41592                                | 0.11928  | 3.07149E-4        | 0.99602        |
| 5     | 0.03711                                | 0.39261                                | 0.11182  | 2.013E-4          | 0.99402        |
| 6     | 0.03826                                | 0.34236                                | 0.11114  | 6.12126E-5        | 0.99748        |
| 7     | 0.04779                                | 0.29703                                | 0.05464  | 2.8595E-5         | 0.99529        |
| 8     | 0.05156                                | 0.26367                                | 0.01469  | 1.50582E-5        | 0.99621        |

**Table S9.** Best fitted parameters ( $\chi_T$ ,  $\chi_S$ ,  $\tau$  and  $\alpha$ ) with the extended Debye model for compound **2** at 3000Oe in the temperature range 2-6 K.

| T / K | $\chi_S / \text{cm}^3 \text{mol}^{-1}$ | $\chi_T / \text{cm}^3 \text{mol}^{-1}$ | $\alpha$ | $\tau / \text{s}$ | R <sup>2</sup> |
|-------|----------------------------------------|----------------------------------------|----------|-------------------|----------------|
| 2     | 0.12631                                | 0.88463                                | 0.33756  | 0.00741           | 0.99581        |
| 2.2   | 0.11974                                | 0.68694                                | 0.25793  | 0.004             | 0.99358        |
| 2.4   | 0.11118                                | 0.68153                                | 0.24403  | 0.00368           | 0.99747        |
| 2.6   | 0.09711                                | 0.67701                                | 0.29236  | 0.00374           | 0.98815        |
| 2.8   | 0.09504                                | 0.61356                                | 0.23267  | 0.00282           | 0.99615        |
| 3     | 0.08966                                | 0.57819                                | 0.21092  | 0.00222           | 0.99795        |
| 3.25  | 0.08739                                | 0.51166                                | 0.14624  | 0.00158           | 0.98922        |
| 3.5   | 0.08013                                | 0.49672                                | 0.14828  | 0.00123           | 0.9874         |
| 3.75  | 0.07445                                | 0.46005                                | 0.12431  | 8.22446E-4        | 0.99201        |
| 4     | 0.0695                                 | 0.44741                                | 0.12097  | 5.36688E-4        | 0.99565        |
| 4.25  | 0.0619                                 | 0.42025                                | 0.12792  | 3.21355E-4        | 0.99108        |
| 4.5   | 0.06094                                | 0.39802                                | 0.10183  | 1.91846E-4        | 0.99045        |
| 4.75  | 0.05712                                | 0.3793                                 | 0.09824  | 1.16346E-4        | 0.99671        |
| 5     | 0.05561                                | 0.35971                                | 0.08591  | 7.21785E-5        | 0.99401        |
| 6     | 0.04665                                | 0.31714                                | 0.10582  | 1.62696E-5        | 0.99353        |

## Computational Details

All calculations were carried out using ORCA 5.0 suite of programs.<sup>1</sup> To extract the zero-field splitting parameters, g-value in complexes, we have prepared a monomeric model of both the complexes called **1**<sub>SeCN</sub>, **2**<sub>Cl</sub> and **3**<sub>Br</sub> (see Figure S19). Next, we optimised the position of hydrogens using the BP86<sup>2,3</sup> level of theory with def2-SVP<sup>4</sup> basis set for all the atoms. The hydrogen optimised coordinates were used for the calculation of electronic, magnetic properties and spin-Hamiltonian parameters (g, D, E) of complexes **1a**<sub>SeCN</sub>, **2a**<sub>Cl</sub> and **3c**<sub>Br</sub>. These properties were computed by using the complete active space self-consistent (CASSCF)<sup>5</sup> method with an active space of CAS (7, 5) i.e., seven active electrons in the five active d-orbitals of Co(II). Using this active space, we have computed all the 10 quartets and 40 doublets states. All these calculations were carried out with a DKH-def2-TZVPP<sup>4</sup> basis set for all atoms. To treat the dynamic correlations, the second-order N-electron valence perturbation theory (NEVPT2)<sup>6</sup> method was employed on the converged CASSCF wavefunction. Ab-initio based ligand field theory (AILFT)<sup>7</sup> analysis was carried out to analyze the nature of ligand field and d-orbital splitting as implemented in ORCA.

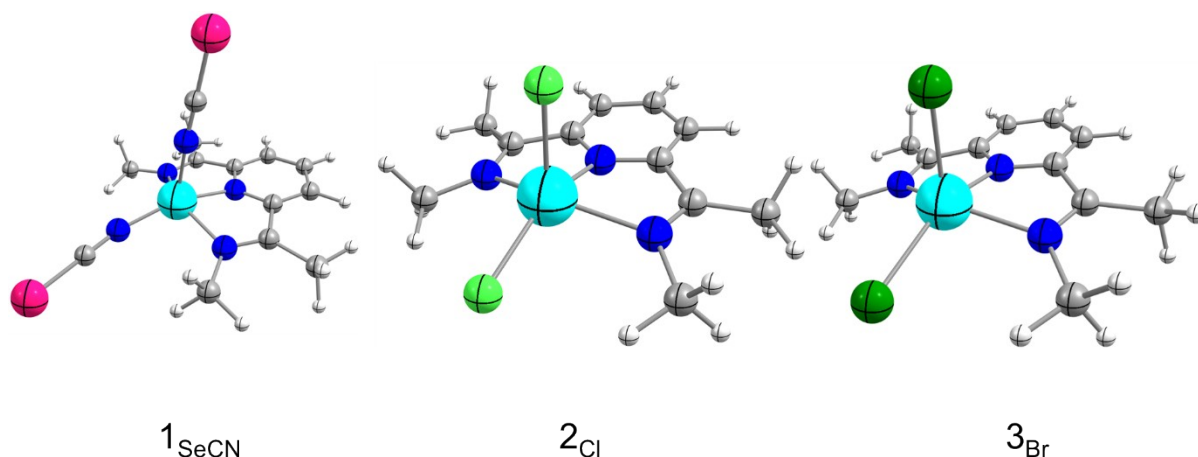

Figure S19: Hydrogen optimised model structures for complexes 1-3. The position of hydrogens was optimized using DFT calculations. Colour code: light blue, Co; dark blue, N; pink, Se; light green, Cl; dark green, Br; grey, C; white, H



Table S10.CASSCF (7,5)+NEVPT2 computed Spin–Hamiltonian parameter (g, D, |E/D|) parameters along with wavefunction decomposition analysis.

| Parameters | $1_{\text{SeCN}}$                                      |        | $2_{\text{Cl}}$                                        |        | $3_{\text{Br}}$                                        |        |
|------------|--------------------------------------------------------|--------|--------------------------------------------------------|--------|--------------------------------------------------------|--------|
|            | CASSCF                                                 | NEVPT2 | CASSCF                                                 | NEVPT2 | CASSCF                                                 | NEVPT2 |
| D          | -65.52                                                 | -48.73 | -74.56                                                 | -59.30 | -61.21                                                 | -45.25 |
| E/D        | 0.18                                                   | 0.20   | 0.14                                                   | 0.14   | 0.22                                                   | 0.23   |
| $g_{xx}$   | 2.054                                                  | 2.066  | 2.073                                                  | 2.084  | 2.078                                                  | 2.093  |
| $g_{yy}$   | 2.308                                                  | 2.279  | 2.345                                                  | 2.295  | 2.429                                                  | 2.351  |
| $g_{zz}$   | 2.936                                                  | 2.761  | 3.073                                                  | 2.895  | 2.976                                                  | 2.775  |
| KD1        | 62% $ 3/2; \pm 3/2\rangle + 36\% 3/2; \pm 1/2\rangle$  |        | 64 % $ 3/2; \pm 3/2\rangle + 32\% 3/2; \pm 1/2\rangle$ |        | 58 % $ 3/2; \pm 3/2\rangle + 38\% 3/2; \pm 1/2\rangle$ |        |
| $g_{xx}$   | 0.999                                                  | 1.090  | 0.851                                                  | 0.826  | 1.183                                                  | 1.213  |
| $g_{yy}$   | 1.304                                                  | 1.451  | 1.072                                                  | 1.032  | 1.663                                                  | 1.687  |
| $g_{zz}$   | 8.459                                                  | 7.927  | 8.913                                                  | 8.448  | 8.448                                                  | 7.884  |
| KD2        | 60 % $ 3/2; \pm 3/2\rangle + 36\% 3/2; \pm 1/2\rangle$ |        | 64 % $ 3/2; \pm 3/2\rangle + 30\% 3/2; \pm 1/2\rangle$ |        | 56 % $ 3/2; \pm 3/2\rangle + 38\% 3/2; \pm 1/2\rangle$ |        |
| $g_{xx}$   | 2.823                                                  | 2.504  | 3.133                                                  | 2.853  | 2.669                                                  | 2.413  |
| $g_{yy}$   | 3.368                                                  | 3.145  | 3.698                                                  | 3.605  | 3.314                                                  | 3.069  |
| $g_{zz}$   | 4.997                                                  | 5.180  | 4.826                                                  | 4.924  | 5.241                                                  | 5.364  |

Table S11. AILFT derived ligand field parameters computed at NEVPT2 level of theory for model complexes **1-3**. The values of  $B$ ,  $C$  and  $\xi$  parameters are provided in units of  $\text{cm}^{-1}$

| Parameter | Free Co(II) | $1_{\text{SeCN}}$ | $2_{\text{Cl}}$ | $3_{\text{Br}}$ | % Reduction |      |      |
|-----------|-------------|-------------------|-----------------|-----------------|-------------|------|------|
| $\xi$     | 527         | 514.9             | 512.5           | 503.6           | 2.30        | 2.75 | 4.44 |
| $B$       | 1042.3      | 977.3             | 1003.9          | 962.0           | 6.24        | 3.68 | 7.70 |
| $C$       | 4156.5      | 3769.2            | 3921.0          | 3823.4          | 9.32        | 5.67 | 8.01 |
| $C/B$     | 3.988       | 3.857             | 3.906           | 3.975           | 3.28        | 2.06 | 0.33 |

% Reduction =

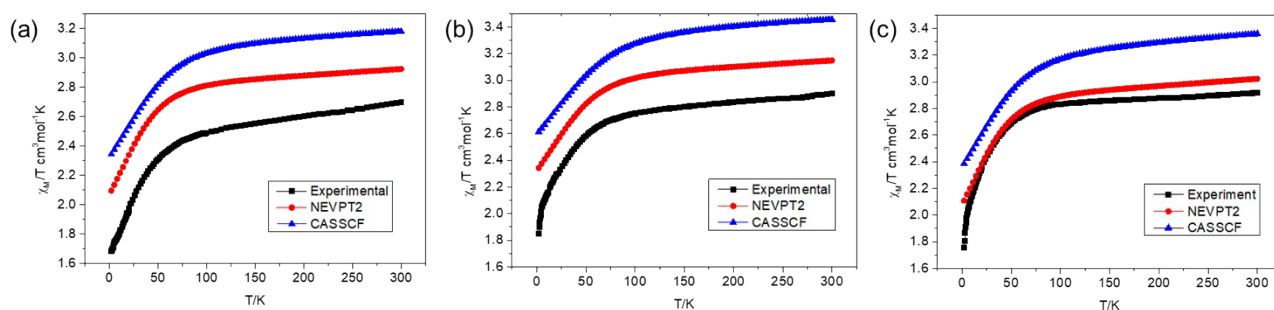

Figure S20: NEVPT2 computed magnetic susceptibility plots for complexes (a)  $1_{\text{SeCN}}$ , (b)  $2_{\text{Cl}}$  and (c)  $3_{\text{Br}}$  where black squares correspond to the experimental values and the blue and red lines correspond to CASSCF and NEVPT2 computed values, respectively. All these computed values are obtained from the calculations on monomeric model complexes.

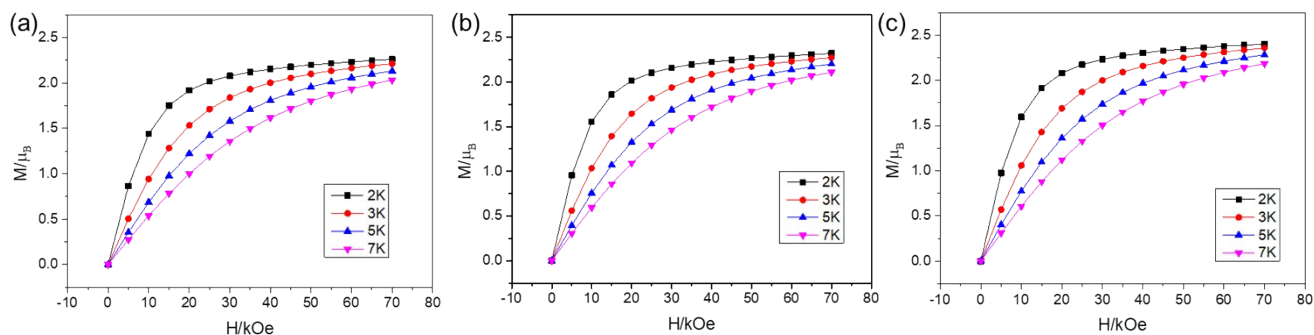

Figure S21. NEVPT2 computed magnetization curves for complexes (a)  $1_{\text{SeCN}}$ , (b)  $2_{\text{Cl}}$  and (c)  $3_{\text{Br}}$  at 2K, 3K, 5K and 7K respectively. All these computed values are obtained from the calculations on monomeric model complexes.

Table S12.CASSCF/NEVPT2 computed 10 spin-free quartets (red) and 40 spin-free doublets (blue) states along with the spin-orbit states for complex  $1_{\text{SeCN}}$ . All values are reported in  $\text{cm}^{-1}$

| SPIN-FREE STATES |         |         |         | SPIN-ORBIT STATES |          |          |          |
|------------------|---------|---------|---------|-------------------|----------|----------|----------|
| CASSCF           |         | NEVPT2  |         | CASSCF            |          | NEVPT2   |          |
| 0                | 35421.6 | 0       | 35307.2 | 0                 | 31005.31 | 0        | 29750.13 |
| 792              | 45555   | 1129    | 39301.9 | 137.08            | 31376.39 | 103.31   | 30181.11 |
| 2395.3           | 45881.3 | 3053.6  | 40208.7 | 1000.84           | 31848.93 | 1282.93  | 30929.37 |
| 4310.1           | 46321.4 | 5465.5  | 40608.2 | 1182.11           | 32649.78 | 1425.64  | 31055.49 |
| 6965.9           | 47899.2 | 8753.8  | 42408.6 | 2576.59           | 33061.53 | 3174.07  | 31433.22 |
| 8127.9           | 47899.6 | 10148.3 | 42423.9 | 2659.17           | 33708.07 | 3258.03  | 32699.64 |
| 12452.6          | 48261.4 | 15590.9 | 43080.2 | 4575.74           | 34131.62 | 5663.6   | 32968.23 |
| 21063.9          | 48372.8 | 18493.5 | 43234.5 | 4701.52           | 34678.62 | 5771.05  | 33572.79 |
| 23690.3          | 69021.1 | 21744.6 | 59018.8 | 7185.76           | 34963.59 | 8900.19  | 34958.19 |
| 25754.1          | 69881.3 | 24080   | 60356.5 | 7255.44           | 35442.52 | 8945.3   | 35312.03 |
| 13971.2          | 71311.9 | 9393.9  | 62058.7 | 8346.85           | 36043.32 | 9623.49  | 35860.27 |
| 17644            | 72958.6 | 14470.7 | 63707.4 | 8460.46           | 45787.69 | 10297.32 | 39506.7  |
| 18211.8          | 73647.4 | 15099.7 | 64408.4 | 12765.3           | 46154.09 | 10417.84 | 40422.04 |
| 18930.1          |         | 15897   |         | 12782.36          | 46646.62 | 14693.77 | 40873.66 |
| 19972.1          |         | 18041.6 |         | 14198.97          | 48068.12 | 15286.33 | 42546.48 |
| 20677.3          |         | 18956.4 |         | 17911.55          | 48248.34 | 15780.57 | 42722.82 |
| 20751.7          |         | 18970.7 |         | 18435.26          | 48604.33 | 15836.28 | 43333.88 |
| 21494.1          |         | 19750.9 |         | 19219.16          | 48694.96 | 16213.13 | 43503.11 |
| 23644.6          |         | 21868   |         | 20128.67          | 69324.54 | 18156.2  | 59275.98 |
| 24216.6          |         | 21995.2 |         | 20966.01          | 70174.43 | 18591.29 | 60601.98 |
| 24980.7          |         | 22228.1 |         | 21110.18          | 71634.58 | 18654.94 | 62328.21 |
| 25649.2          |         | 22734.7 |         | 21245.17          | 73245.2  | 19182.59 | 63943.11 |
| 27675.6          |         | 25819.9 |         | 21288.06          | 73998.07 | 19305.21 | 64708.45 |
| 28442.5          |         | 26495.8 |         | 21809.46          |          | 20001.92 |          |
| 28927.2          |         | 27054.3 |         | 23741.62          |          | 21519.14 |          |
| 29316.9          |         | 27493.1 |         | 23817.89          |          | 21839.79 |          |
| 30176.8          |         | 28792.9 |         | 23911.75          |          | 22075.43 |          |
| 30633            |         | 29473.1 |         | 24515.09          |          | 22278.68 |          |
| 31015.3          |         | 29890.7 |         | 25397.29          |          | 22741.34 |          |
| 31527.9          |         | 30816.1 |         | 25887.25          |          | 23205.54 |          |
| 32570.2          |         | 30862   |         | 26038.24          |          | 24270.96 |          |
| 32608.8          |         | 31009.8 |         | 26277.42          |          | 24343.72 |          |
| 33512.2          |         | 32556.3 |         | 27919.8           |          | 26014.84 |          |
| 33847.2          |         | 32763.2 |         | 28676.06          |          | 26692.24 |          |
| 34059.1          |         | 32984.1 |         | 29235.39          |          | 27322.99 |          |
| 34604.5          |         | 34717.2 |         | 29674             |          | 27805.43 |          |
| 35226.2          |         | 35190.7 |         | 30370.68          |          | 28957.56 |          |

Table S13. CASSCF/NEVPT2 computed 10 spin-free quartets (red) and 40 spin-free doublets (blue) states along with the spin-orbit states for complex  $2_{Cl}$ . All values are reported in  $\text{cm}^{-1}$

| SPIN-FREE STATES |         |         |         | SPIN-ORBIT STATES |          |          |          |
|------------------|---------|---------|---------|-------------------|----------|----------|----------|
| CASSCF           |         | NEVPT2  |         | CASSCF            |          | NEVPT2   |          |
| 0                | 44553.5 | 0       | 39808.9 | 0                 | 29077.96 | 0        | 28463.06 |
| 628.9            | 44668.2 | 921.4   | 40201.4 | 153.46            | 29409.12 | 122.12   | 28785.33 |
| 2212.8           | 45151.9 | 3050.5  | 40926.6 | 873.19            | 29780.34 | 1113.13  | 28986.16 |
| 3058.6           | 46031.8 | 4245.6  | 41877.8 | 1080.47           | 30445.69 | 1278.27  | 29253.57 |
| 5567.4           | 46054.4 | 7217.2  | 41962.2 | 2388.24           | 30815.59 | 3171.97  | 29647.08 |
| 5873.7           | 46252.7 | 7625.6  | 42389.9 | 2483.51           | 31449.88 | 3257.4   | 31078.96 |
| 8715.3           | 46521.7 | 11329.5 | 42635.4 | 3385.26           | 31724.82 | 4488.7   | 31285.16 |
| 20392.9          | 68392.2 | 18343.9 | 60012.4 | 3571.05           | 32018.66 | 4638.09  | 31595.51 |
| 21999.8          | 68412.8 | 20710.9 | 60105.8 | 5781.51           | 32288.69 | 7368.91  | 31841.65 |
| 23227.2          | 69512.4 | 21738.8 | 61383.8 | 5863.23           | 32475.98 | 7438.48  | 32228.27 |
| 16453.2          | 70817.5 | 13377.9 | 63065.2 | 6159.44           | 33389.03 | 7840.2   | 33214.68 |
| 18549.4          | 71277.5 | 16666.7 | 63524.5 | 6349.52           | 44850.44 | 8003.49  | 40053.55 |
| 18858.8          |         | 16692.1 |         | 9113.44           | 44977.74 | 11629.68 | 40451.56 |
| 19129.4          |         | 17416.2 |         | 9149.01           | 45492.47 | 11653.86 | 41193.68 |
| 20079.9          |         | 18994.4 |         | 16675.73          | 46241.16 | 13586.65 | 42050.37 |
| 20168.2          |         | 19204.8 |         | 18775.97          | 46465.81 | 16761.17 | 42297.88 |
| 20364.5          |         | 19282.6 |         | 19132.49          | 46639.9  | 17048.09 | 42685.24 |
| 21182.7          |         | 20532.8 |         | 19454.87          | 46895.44 | 17670.58 | 42933.73 |
| 22238.1          |         | 21728.5 |         | 20266.7           | 68639.62 | 18484.48 | 60224.2  |
| 24143            |         | 22159.8 |         | 20576.87          | 68857.57 | 18532.8  | 60468.68 |
| 24502.7          |         | 22357.4 |         | 20616.49          | 69879.29 | 19124.36 | 61688.55 |
| 25516.3          |         | 23294.5 |         | 20674.97          | 71136.5  | 19485.59 | 63317.43 |
| 26774.3          |         | 25681.5 |         | 20791.63          | 71692.67 | 19676.18 | 63877.78 |
| 27402.5          |         | 26129.2 |         | 21504.24          |          | 20745.45 |          |
| 27564.3          |         | 26343.5 |         | 22185.87          |          | 20815.78 |          |
| 27874.1          |         | 26802.6 |         | 22266.5           |          | 20897.21 |          |
| 28347.6          |         | 27827.5 |         | 22544.95          |          | 21561.85 |          |
| 28531.9          |         | 28290.9 |         | 23344.16          |          | 21946.06 |          |
| 29093.7          |         | 28356.6 |         | 23533.42          |          | 22210.89 |          |
| 29331.9          |         | 28818.8 |         | 24524.56          |          | 22456.63 |          |
| 30252.7          |         | 28849.8 |         | 25096.82          |          | 22973.63 |          |
| 30358.6          |         | 29229.8 |         | 25932.03          |          | 23708.3  |          |
| 31356.7          |         | 30990.3 |         | 27033.16          |          | 25865.05 |          |
| 31383            |         | 31111.7 |         | 27603.34          |          | 26321.98 |          |
| 31605.4          |         | 31129.1 |         | 27892.91          |          | 26665.95 |          |
| 31708.6          |         | 31300.4 |         | 28287.55          |          | 27112.85 |          |
| 31925.5          |         | 31953.1 |         | 28586.34          |          | 28021.78 |          |
| 32696.3          |         | 32619.5 |         |                   |          |          |          |

Table S13. CASSCF/NEVPT2 computed 10 spin-free quartets (red) and 40 spin-free doublets (blue) states along with the spin-orbit states for complex  $3_{Br}$ . All values are reported in  $\text{cm}^{-1}$

| SPIN-FREE STATES |         |         |         | SPIN-ORBIT STATES |          |          |          |
|------------------|---------|---------|---------|-------------------|----------|----------|----------|
| CASSCF           |         | NEVPT2  |         | CASSCF            |          | NEVPT2   |          |
| 0                | 32544   | 0       | 32075.6 | 0.00              | 29140.10 | 0.00     | 27899.21 |
| 741.8            | 44538.4 | 1113.2  | 38134.5 | 130.84            | 29510.92 | 97.48    | 28069.61 |
| 2026.4           | 44589.4 | 2874.7  | 38574   | 949.47            | 29784.17 | 1267.72  | 28523.45 |
| 2869             | 44928.1 | 4076    | 39099   | 1123.53           | 30518.18 | 1401.51  | 28766.47 |
| 5502.2           | 46144.7 | 7190.6  | 40403   | 2204.51           | 30862.18 | 2986.30  | 29283.03 |
| 5963.7           | 46170.3 | 7849.2  | 40435.3 | 2282.18           | 31239.84 | 3060.18  | 30261.88 |
| 8768.5           | 46332.5 | 11648.7 | 40828.3 | 3180.11           | 31602.27 | 4297.12  | 30527.34 |
| 20374            | 46530.1 | 17629.7 | 41020.1 | 3360.73           | 31876.09 | 4441.71  | 31009.76 |
| 21561.9          | 68097.1 | 19522.5 | 58112.7 | 5700.95           | 32232.45 | 7326.64  | 31223.81 |
| 23724            | 68194.5 | 21619.3 | 58307.5 | 5777.65           | 32423.93 | 7388.84  | 31717.82 |
| 16096.7          | 69732.8 | 12209.3 | 59937.2 | 6212.28           | 33218.52 | 8024.21  | 32620.37 |
| 18230.2          | 70731.2 | 15546.2 | 61270   | 6401.26           | 44798.61 | 8178.41  | 38351.99 |
| 18895.8          | 71466.4 | 16396.6 | 61992.8 | 9134.69           | 44873.89 | 11909.33 | 38791.06 |
| 19109.5          |         | 16476.6 |         | 9168.00           | 45260.19 | 11929.13 | 39349.03 |
| 19913.1          |         | 18281.8 |         | 16300.15          | 46335.42 | 12400.70 | 40538.24 |
| 20076            |         | 18569   |         | 18489.07          | 46523.09 | 15770.60 | 40739.73 |
| 20493.2          |         | 18884.2 |         | 19098.39          | 46711.56 | 16502.69 | 41105.32 |
| 21051.9          |         | 19725.1 |         | 19414.65          | 46878.25 | 16793.13 | 41289.31 |
| 22159.4          |         | 20914.5 |         | 20089.78          | 68366.09 | 17747.24 | 58338.39 |
| 23851.4          |         | 21540.7 |         | 20490.51          | 68568.63 | 17791.92 | 58599.59 |
| 24255.6          |         | 21568.8 |         | 20576.18          | 70064.59 | 18389.78 | 60207.59 |
| 25271.1          |         | 22449   |         | 20608.86          | 71045.15 | 18873.07 | 61514.66 |
| 26753.5          |         | 24578.9 |         | 20826.88          | 71835.33 | 19149.41 | 62297.34 |
| 27301.4          |         | 25346.2 |         | 21364.98          |          | 19603.96 |          |
| 27841.3          |         | 25693.1 |         | 21741.92          |          | 19698.47 |          |
| 27920.4          |         | 26080.7 |         | 21827.67          |          | 19969.49 |          |
| 28392.3          |         | 27075.6 |         | 22430.09          |          | 20964.59 |          |
| 28651.8          |         | 27623.4 |         | 23669.54          |          | 21577.91 |          |
| 29242.1          |         | 27780.4 |         | 23961.69          |          | 21779.23 |          |
| 29338.1          |         | 28269.6 |         | 24360.05          |          | 21939.95 |          |
| 30344.9          |         | 28520.4 |         | 24846.85          |          | 22227.28 |          |
| 30498.2          |         | 28977.1 |         | 25663.75          |          | 22837.21 |          |
| 31077            |         | 30101.6 |         | 26990.10          |          | 24762.87 |          |
| 31249.9          |         | 30344   |         | 27533.12          |          | 25519.34 |          |
| 31467.9          |         | 30587.8 |         | 27984.21          |          | 25930.38 |          |
| 31736.8          |         | 30743.8 |         | 28340.95          |          | 26380.98 |          |
| 31959.9          |         | 31518.9 |         | 28672.42          |          | 27263.02 |          |

References:

- 1 F. Neese, *Wiley Interdiscip. Rev. Comput. Mol. Sci.*, 2022, **e1606**, 1–15.
- 2 A. D. Becke, *Phys. Rev. A*, 1988, **38**, 3098–3100.
- 3 J. P. Perdew, *Phys. Rev. B*, 1986, **33**, 8822–8824.
- 4 F. Weigend and R. Ahlrichs, *Phys. Chem. Chem. Phys.*, 2005, **7**, 3297–3305.
- 5 P. Å. Malmqvist and B. o. Roos, *Chem. Phys. Lett.*, 1989, **155**, 189–194.
- 6 C. Angeli, R. Cimiraglia, S. Evangelisti, T. Leininger, J. Malrieu, C. Angeli and R. Cimiraglia, *J. Chem. Phys.*, 2014, **114**, 10252–10264.
- 7 M. Atanasov, D. Ganyushin, K. Sivalingam and F. Neese, in *Molecular Electronic Structures of Transition Metal Complexes II*, 2012, pp. 149–220.
